## Prognostic significance of *SOCS1* and *SOCS3* tumor suppressors in hepatocellular carcinoma and its correlation to key oncogenic signaling pathways

Md Gulam Musawwir Khan<sup>1</sup>, Amit Ghosh<sup>1</sup>, Bhavesh Varia<sup>1</sup>, Madanraj Appiya Santharam<sup>1</sup>, Awais Ullah Ihsan<sup>1</sup>, Sheela Ramanathan<sup>1,2</sup> and Subburaj Ilangumaran<sup>1,2\*</sup>

<sup>1</sup> Department of Immunology and Cell Biology, Faculty of Medicine and Health Sciences, Université de Sherbrooke, Sherbrooke J1H 5N4, Québec, Canada;

<sup>2</sup> CRCHUS, Centre Hospitalier de l'Université de Sherbrooke, Québec, Canada

\*Correspondence: Subburaj.Ilangumaran@USherbrooke.ca

### Abstract

Suppressor of cytokine signaling (SOCS) proteins *SOCS1* and *SOCS3* are considered tumor suppressors in liver hepatocellular carcinoma (LIHC). To gain insight into the underlying molecular mechanisms, the expression of *SOCS1/ SOCS3* was evaluated in The Cancer Genome Atlas LIHC dataset along with key oncogenic signaling pathway genes. *SOCS1* expression was not significantly reduced in HCC yet higher expression predicted favorable prognosis, whereas *SOCS3* lacked predictive potential despite lower expression. Only a small proportion of the cell cycle, receptor tyrosine kinase, growth factor and RAS-RAF-MEK-MAPK signaling genes negatively correlated with *SOCS1* or *SOCS3*, of which even fewer showed elevated expression in HCC and predicted survival. However, many PI3K-AKT-MTOR pathway genes showed mutual exclusivity with *SOCS1/SOCS3* and displayed independent predictive ability. Among genes that negatively correlated with *SOCS1/SOCS3*, *CDK2*, *MLST8*, *AURKA*, *MAP3K4* and *RPTOR* showed corresponding modulations in the livers of mice lacking *Socs1* or *Socs3* during liver regeneration and in experimental HCC, and in Hepa1-6 murine HCC cells overexpressing *SOCS1/SOCS3*. However, Cox proportional hazards model identified *CXCL8*, *DAB2* and *PIK3R1* as highly predictive in combination with *SOCS1* or *SOCS3*. These data suggest that developing prognostic biomarkers and precision treatment strategies based on *SOCS1/SOCS3* expression need careful testing in different patient cohorts.

**Keywords:** hepatocellular carcinoma; *SOCS1*; *SOCS3*; TCGA; tumor suppressor; oncogenic signalling; prognosis; precision medicine

### 1. Introduction

Liver cancer, which arises mainly from hepatocellular carcinoma (HCC), is the fifth most prevalent and the third most lethal cancer worldwide [1]. Despite significant advances in understanding the molecular mechanisms of HCC pathogenesis, therapeutic options remain limited and even the most promising drugs such as Sorafenib show only modest efficacy in clinics [2]. Therefore, new therapies targeting various oncogenic signaling pathways are being developed and some are at various phases of clinical testing [3]. Concurrently, the availability

of mouse genetic models and high-quality transcriptomic data from pathology specimens through The Cancer Genome Atlas (TCGA) consortium are fueling efforts to gain a deeper understanding of the molecular heterogeneity in the pathogenesis of HCC in order to identify new therapeutic targets and tailor precision treatment strategies [4-8].

Systematic analysis of the aberrant DNA methylation pattern in a distinct region of chromosome 16 in HCC specimens revealed epigenetic silencing of the gene coding of suppressor of cytokine signaling 1 (*SOCS1*) in up to 65% of human primary HCC tumor samples [9,10]. The *SOCS3* gene is also repressed in 33% of HCC specimens [11]. *SOCS1* and *SOCS3* proteins have been extensively studied in immune cells as key regulators of cytokine and growth factor receptor signaling [12]. As physiological hepatocyte proliferation is regulated by cytokines and growth factors, most of which also promote neoplastic growth [13-15], several groups, including our own, studied liver regeneration in mice lacking *Socs1* or *Socs3* and their susceptibility to HCC induced by the hepatocarcinogen diethyl nitrosamine (DEN) [16-19]. These studies reported an increased rate of liver regeneration and heightened susceptibility to DEN-induced HCC in these mice. These findings, in corroboration with clinical data on epigenetic repression of *SOCS1* and *SOCS3* genes in HCC specimens, clearly established non-overlapping tumor suppressor functions of *SOCS1* and *SOCS3*. Moreover, HCC invariably arises in cirrhotic livers, which provides not only an inflammatory environment for hepatocarcinogenesis but also increases the availability of cytokines and growth factors [14]. *SOCS1* has been implicated in regulating hepatic fibrogenic response, presumably through regulating cytokine and growth factor signaling in hepatic stellate cells and liver resident and infiltrating immune cells [16,20,21]. *SOCS3* may also play similar roles in controlling liver fibrosis [22]. Therefore, *SOCS1* and *SOCS3* may regulate hepatocyte proliferation directly as well as indirectly by modulating the liver tissue environment.

*SOCS1* and *SOCS3* share maximum sequence homology and structural similarity among the *SOCS* family members, yet significantly differ in their ability to control cytokine and growth factor signaling [23]. Whereas *SOCS1* controls hepatocyte growth factor (HGF) signaling via the receptor tyrosine kinase MET [24], *SOCS3* is essential to control IL-6 signaling and also regulates epidermal growth factor receptor (EGFR) signaling [19]. *SOCS1* also regulates the paradoxical oncogenic functions of the cell cycle inhibitor CDKN1A, which generally functions as a tumor suppressor [17]. These findings on cell lines and preclinical animal models imply diverse roles for *SOCS1* and *SOCS3* in regulating hepatocyte proliferation and neoplastic growth. However, whether these functions are compromised in primary HCC is not yet clear.

To gain a deeper understanding of the non-overlapping tumor suppressor functions of *SOCS1* and *SOCS3*, and to identify the signaling pathways that are aberrantly activated in the absence of *SOCS1* or *SOCS3*, we carried out a systematic analysis on the TCGA dataset on liver hepatocellular carcinoma (TCGA-LIHC) [6]. We evaluated how *SOCS1* and *SOCS3* gene expression correlates with genes implicated in hepatocarcinogenesis, placing emphasis on

genes that regulate hepatocyte proliferation and survival. Our findings show that the expression of *SOCS1* and *SOCS3* negatively correlates with several genes in a similar fashion, but also show distinct regulation of a number of genes in several oncogenic signaling pathways. The latter could explain, at least partly, the inability of *SOCS3* to compensate for the loss of *SOCS1* and *vice versa* in animal models of HCC. We identify *SOCS1* but not *SOCS3* as an independent prognostic factor, whereas both display improved predictive potential when combined with certain key genes of the oncogenic signaling pathways. Besides, our findings reveal important differences between published works on putative HCC biomarkers and the TCGA data, highlighting the need for further studies on prognostic biomarkers for precision HCC therapy.

## **2. Materials and Methods**

### **2.1. TCGA-LIHC dataset**

The gene expression analysis was performed on the RNAseq data from the TCGA provisional dataset on LIHC generated by the TCGA Research Network (<https://www.cancer.gov/tcga>) [6]. The provisional TCGA-LIHC cohort contains 442 specimens, of which RNAseq V2 data are available for 373 samples. Within this dataset, fifty samples contained paired tumor and adjacent normal tissues. The gene expression dataset was downloaded from the cBioportal suite for cancer genomics research (<https://www.cbioportal.org>) and analyzed using various publicly available tools as illustrated in the workflow in Supplementary Figure S1.

### **2.2. Correlation between *SOCS1/SOCS3* and oncogenic signaling pathway genes**

The various oncogenic signaling pathway genes found to be commonly affected in diverse cancers have been identified and categorized by the TCGA working groups [29]. Among these pathways, those related to cell survival and proliferation were chosen for comparative analysis with *SOCS1* and *SOCS3* genes. These pathways include cell cycle control (34 genes), RTK signaling and angiogenesis (19 genes), other growth/proliferation signaling and telomerase (11 genes), RAS-RAF-MEK-MAPK signaling (26 genes) and PI3K-AKT-MTOR signaling (17 genes). The genes within each pathway are listed in the respective figures. Correlation between the expression of *SOCS1/SOCS3* and those of the query genes in the aforementioned oncogenic signaling pathways was evaluated by Pearson's nonparametric correlation analysis (one-tailed) using the GraphPad Prism (version 8) software. The correlation coefficient ( $\rho$ -value) was represented in a heatmap to reveal the relationship between *SOCS1/SOCS3* and genes within the selected pathways. Statistical significance of the correlation is indicated asterisks within the heatmap.

### **2.3. Impact of gene expression on patient survival**

Correlation between gene expression and patient survival was analyzed using TCGA Clinical Data Resource (TCGA-CDR) available through the UALCAN platform (<http://ualcan.path.uab.edu/index.html>) [104,105]. UALCAN was used to determine the expression of the query genes in tumor vs non-tumor tissues and across the tumor grades, and its relationship to patient survival. The Kaplan-Meier survival plots were generated by

comparing the high expression cases (top 25%) with moderate/ low expression (the remaining 75%). Significance of the survival impact in these two groups was measured by log-rank (Mantel-Cox) *p*-values, or by Gehan-Breslow-Wilcox test where indicated.

#### **2.4. STRING analysis**

The STRING database (<http://www.stringdb.org/>) was used to illustrate the protein-protein interaction network between *SOCS1*, *SOCS3* and the query proteins in each oncogenic signaling pathway. Only medium and high confidence interactions with a score above 0.40, supported by experiments and/or curated databases on signal transduction pathways were considered for data interpretation.

#### **2.5. Cox proportional hazard model**

The expression levels of all genes in the selected oncogenic signaling pathways were dichotomized according to the pre-determined cut-off values of low or high expression ( $\leq 25^{\text{th}}$  percentile and  $\geq 25^{\text{th}}$  percentile) and the remaining ( $> 75^{\text{th}}$  percentile and  $< 75^{\text{th}}$  percentile). Each list was combined with the dichotomized lists for *SOCS1* and *SOCS3*, resulting in four different dichotomous combinations (low *SOCS1* + low *Gene-X* versus rest, low *SOCS1* + high *Gene-X* vs rest, high *SOCS1* + low *Gene-X* vs rest, high *SOCS1* + high *Gene-X* vs rest). All possible combinations of *SOCS1* with all query genes were entered into a Cox proportional hazards model using the SAS software v9.4 (SAS Institute Inc., Cary, NC). A stepwise selection was used to determine the most predictive combination for patient survival (better or poor survival). The significant effects of the selected combination variables were then validated with a univariate log-rank test for the query gene. The same procedure was applied to *SOCS3*.

#### **2.6. Mice studies**

Hepatocyte-specific *SOCS1*-deficient mice, generated by crossing *Socs1<sup>fl/fl</sup>* mice with albumin-Cre (*Alb<sup>Cre</sup>*) mice, have been already described [17]. *Socs3<sup>fl/fl</sup>* mice were purchased from the Jackson laboratories (B6;129S4-*Socs3<sup>tm1Ayo</sup>/J*) and hepatocyte-specific *SOCS3*-deficient mice were generated by crossing them with *Alb<sup>Cre</sup>* mice. All animal experiments were carried out with the approval of the Université de Sherbrooke Ethical committee on animal experimentation (protocol number 226-17B) in accordance with the guidelines set by the Canadian Council on Animal care (CCAC). Partial hepatectomy was carried out on 8-10 weeks old mice as detailed previously [28], and remnant liver tissues were harvested after 24h. Experimental HCC was induced by the administration of diethyl nitrosamine to 2-weeks old male pups as previously described [17]. The mice were euthanized after 8 months, and macroscopic liver tumor nodules and adjacent normal tissues were resected. Small pieces of tissues were immersed in RNAlater (ThermoFisher) and stored at  $-20^{\circ}\text{C}$  for gene expression analysis.

#### **2.7. Cell lines**

Murine HCC cell line Hepa1-6 (ATCC: CRL-1830) stably expressing *SOCS1* has been previously reported [28]. Hepa1-6 cells were transfected with *SOCS3* expression construct in

pcDNA3 vector and stable *SOCS3* expressing stable lines were tested for the attenuation of IL-6-induced STAT3 phosphorylation.

## 2.8. Quantitative RT-PCR

Total RNA was isolated from liver tissues and cell lines using RiboZol™ (AMRESCO, Solon, OH). After verifying the RNA quality by UV absorption, the first complementary strand was made from 1 µg total RNA using QuantiTect® reverse transcription kit (Qiagen). RT-PCR for the for gene expression analysis was carried out using the CFX-96 thermocycler (Bio-Rad, Mississauga, ON) using the following primers:

Mouse *Cdk2* (NM\_016756): Fw-GCATTCTCTTCCCCTCATC; and  
Rv-GGACCCCTCTGCATTGATAAG;  
*Aurka* (NM\_011497): Fw-TGAGTTGGAAAGGGACATGG and  
Rv-GGGAACAGTGGTCTTAACAGG;  
Human *Mlst8* (NM\_019988): Fw-CTGAGTCTTCCATCACGTCTG and  
Rv-GATCTTGGTCTTAGGGATGAGC;  
*Rptor* (NM\_028898): Fw-CACTCCTTGCTTCATCTGGG and  
Rv-TGTCATGGTCCTATGTTTCAGC;  
House-keeping genes: mouse *m36b4*; m36B4 (NM\_007475.5):  
Fw-TCTGGAGGGTGTCCGCAAC and Rv-CTTGACCTTTTCAGTAAGTGG.

All primers showed more than 90% efficiency with a single melting curve. Expression levels of the housekeeping gene were used to calculate fold induction of the specific genes modulated by the absence or presence of *SOCS1* or *SOCS3*.

## 3. Results

### 3.1. Reduced Expression Of *SOCS1* But Not *SOCS3* Correlates With Poor Patient Survival

Analysis of the TCGA-LIHC RNAseq data was carried out following the workflow illustrated in Supplementary Figure S1 and detailed in the methods sections. Contrary to the reports on epigenetic *SOCS1* gene repression in HCC [9,11], the TCGA dataset did not show any significant difference in *SOCS1* expression between tumor tissues and adjacent normal tissues, whereas *SOCS3* expression was significantly reduced in tumor tissues (Figure 1A). Extending this analysis to TCGA-LIHC samples grouped according to the tumor grade also showed no significant difference for *SOCS1* expression across the tumor grades, whereas *SOCS3* was significantly reduced with increasing tumor grade (Figure 1B). On the other hand, higher *SOCS1* expression correlated positively with overall patient survival, whereas the *SOCS3* expression level did not correlate with disease outcome (Figure 1C). These data suggest that despite the lack of correlation with the tumor stage, reduced *SOCS1* expression in tumor tissues has an independent prognostic value, whereas reduced *SOCS3* expression *per se* does not have a prognostic significance. Nonetheless, compelling evidence for the non-overlapping tumor suppressor functions of *SOCS1* and *SOCS3* from genetic ablation studies in mouse models [16-19] prompted us to investigate the relationship between the expression levels of *SOCS1* and *SOCS3* in the TCGA-LIHC dataset and the key signaling pathway genes implicated in carcinogenesis.

### 3.2. Cell Cycle Regulation

*SOCS1* and *SOCS3* are implicated in the regulation of HGF and IL-6 signaling pathways that promote hepatocyte proliferation and HCC pathogenesis [19,24-28]. Besides, the cell cycle pathway contains the most frequently altered genes in the TCGA-LIHC dataset [29]. Therefore, we evaluated the relationship between the expression of *SOCS1* and *SOCS3* with the thirty-four genes of the cell cycle identified by the cBioportal to be generally deregulated in TCGA datasets of different cancers. STRING analysis predicted these proteins to be tightly interconnected and to *SOCS1* and/or *SOCS3* either directly or indirectly via other members of this group (Supplementary Figure S2A). Next, we retrieved the mRNA expression data for these genes from the TCGA-LIHC dataset and performed non-parametric Spearman correlation (one-way) analysis to determine their common and differential relationship to *SOCS1* and *SOCS3* in terms of co-occurrence or mutual exclusivity.

A heatmap depicting the correlation between the select cell cycle genes with *SOCS1* or *SOCS3* is shown in Figure 2A with the Spearman's rank correlation coefficient ( $\rho$ ) aligned at the extremities for *SOCS1*. The  $\rho$ -value of -1 and 1 (green to red) implies a stronger linear relationship of mutual exclusivity and co-occurrence, respectively. The significance of the correlation ( $p$ -value) is depicted within the heatmap. Surprisingly, out of the thirty-four cell cycle genes implicated in oncogenesis, eighteen positively correlated with *SOCS1* in the HCC tumors and fifteen with *SOCS3*, presumably reflecting their induction by growth stimulatory signals such as STAT activation. This notion is supported by a strong positive correlation for both *SOCS1* and *SOCS3* with *STAT3* and *STAT5A* (Figure 2A). It is noteworthy that *SOCS1* and *SOCS3* were discovered as STAT-inducible proteins [30-32]. High expression of many genes that showed a positive correlation with *SOCS1*, as well as a number of genes that showed no correlation, displayed the ability to independently predict poor prognosis (Supplementary Table 1).

As the focus of the present study is to understand the impact of the loss of *SOCS1* and *SOCS3* tumor suppressors on oncogenic signaling, we focused primarily on tumor-promoting genes that showed a negative correlation with *SOCS1* and *SOCS3* expression. Whereas *SOCS1* showed a significant negative correlation with six of the thirty-four cell cycle genes (*STAT5B*, *CDK6*, *RBL2*, *CDK2*, *CCND1* and *CDKN1B*), *SOCS3* showed mutual exclusivity with only three namely, *STAT5B*, *E2F8*, and *E2F1* (Figure 2A). Of note, *STAT5B* displayed a weak mutual exclusivity with both *SOCS1* and *SOCS3*, whereas *STAT5A* showed a strong co-occurrence. Next, we examined the expression of the eight genes, which showed mutually exclusivity with *SOCS1*, *SOCS3* or both, in HCC tumors and assessed their relationship to patient survival. Most of these genes (*STAT5B*, *CDK6*, *CDK2*, *CDKN1B*, *E2F8*, and *E2F1*) showed high mRNA expression in tumor tissues compared to adjacent non-tumor tissues (Figure 2B) with increased expression levels in poorly differentiated grade 3 and grade 4 tumors (Supplementary Figure S2B). However, the elevated expression of most of these genes

in HCC tumor tissues did not predict patient survival except *CDK2* and *E2F8*, a higher expression of which was associated with poor survival (Figure 2C).

### 3.3. *RTK signaling and angiogenesis pathways*

Receptor tyrosine kinase (RTK) signaling activated by growth factors HGF, EGF and IGF, which provide mitogenic signals needed for physiologic hepatocyte proliferation, can become oncogenic in transformed hepatocytes through receptor amplification, increased ligand availability, deregulated control mechanisms and RTK synergy [15,33,34]. In addition, growth factors that signal via RTKs such as FGF, PDGF and VEGF provide mitogenic signals to hepatic stellate cells, fibroblasts and endothelial cells that promote tumor growth and angiogenesis. *SOCS1* and *SOCS3* regulate HGF receptor MET and EGFR in hepatocytes, and also impact on the hepatic fibrogenic response that can increase ligand availability [19,24,26,28,35]. Therefore, we examined the relationship between *SOCS1/SOCS3* expression and sixteen driver genes of RTKs signaling and six genes of the angiogenesis pathway, three of which overlap with the RTK pathway. Intriguingly, only a few of these genes, *ERBB3*, *VEGFA* and *CXCL8* displayed the ability to predict the disease outcome (Supplementary Table 1). STRING analysis revealed that *SOCS1* and *SOCS3* are connected to these groups of genes through *KIT*, *IGF1R* and *EGFR* (Supplementary Figure S3A). *SOCS1* is coordinately regulated with nine of the sixteen genes in the RTKs signaling and four of the six angiogenesis genes (Figure 3A). *SOCS3* showed additional positive correlations in both pathways. A negative correlation was found only for *ERBB2* (also known as EGFR2, HER2) and *KDR* (also known as VEGFR2/ FLK1) with both *SOCS1* and *SOCS3*, and additionally for *EGFR* with *SOCS1* (Figure 3A). Among these, elevated expression in cancer tissues was observed for *ERBB2* (Figure 3B), but it did not correlate with patient survival (Figure 3C) possibly due to reduced expression in advanced grade tumors (Supplementary Figure S3B).

The HGF receptor MET is an RTK strongly implicated in the pathogenesis of HCC as well as many other cancers, which upregulate MET during disease progression [36]. Others and we have shown that *SOCS1* and *SOCS3* can regulate MET signaling in the liver and in HCC cell lines [24,26,28]. Deregulation of *MET* through genomic alterations in the TCGA-LIHC dataset has also been reported [6,29]. Therefore, we included *MET* expression in our analysis and found it inversely related to both *SOCS1* and *SOCS3* expression (Figure 3A). Elevated *MET* expression occurs in HCC cancer tissues, but it does not correlate with disease progression or predict patient survival (Figure 3B, 3C; supplementary Figure S3B).

Angiogenesis driven by VEGF is crucial for the progression of HCC, and KDR (Kinase insert Domain Receptor, also known as VEGFR2) is a key signal transducer of VEGFA-induced endothelial cell survival, proliferation, migration and vessel formation [37,38]. The expression of KDR is negatively correlated with *SOCS1*, but *SOCS3* showed a positive correlation with KDR as well as VEGFA (Figure 3A). Whereas VEGFA is elevated in HCC and impacts negatively on patient survival, KDR expression was not increased in HCC (Figure 3B, 3C).

### 3.4. Other growth factors/proliferation signaling pathways and telomerase maintenance

Besides the classical growth factor signaling pathways discussed above, certain non-canonical growth factors and cell proliferation signals contribute to the pathogenesis of several cancers including HCC. This pathway includes genes coding for colony-stimulating factor-1 (CSF1) and its receptor CSF-1R, fibroblast growth factor (FGF)-FGFR and insulin-like growth factor (IGF)-IGFR systems [39-42], and a select set of less well-studied molecules implicated in carcinogenesis such as aurora kinase (*AURKA*) and diphthamide biosynthesis 1 (*DPH1*) [43,44]. STRING network showed that *SOCS1* and *SOCS3* associated directly with IGF1R, and *SOCS1* additionally with CSF1R (Supplementary Figure S4A). A majority of these eleven genes of this group are coordinately regulated with *SOCS1* and *SOCS3* in the TCGA HCC dataset (Figure 4A, Supplementary Table 1). Two key genes involved in telomerase maintenance reverse transcriptase (*TERT*) and the telomerase RNA component (*TERC*), which are critical for telomerase reactivation during HCC pathogenesis [45], are also included within this group. Notably, significant mutual exclusivity was observed for *SOCS3* with *TERT*, *TERC* and *AURKA*, and for *SOCS1* with *DPH1* (Figure 4A). All these four genes showed higher mRNA expression in HCC tumors compared to normal liver tissue, with high expression of *AURKA* and *DPH1* across the tumor grades (Figure 4B, Supplementary Figure S4B). However, among them, only *AURKA* displayed significant predictive potential with high expression correlating with poor survival (Figure 4C). Even though long telomeres characterize HCC, *TERT* and *TERC* expression levels lacked predictive potential in the TCGA-LIHC dataset.

### 3.5. RAS-RAF-MAPK signaling pathways

The mitogen-activated protein kinases (MAPK) contribute to carcinogenesis via promoting many cellular functions such as cell survival, proliferation and epithelial to mesenchymal transition [46]. This pathway includes extracellular signal-regulated kinase (ERK), c-Jun N-terminal kinase (JNK) and p38 stress-activated kinase (SAPK), of which ERKs activated downstream of growth factor RTKs, and JNKs activated by inflammatory stimuli are strongly implicated in HCC pathogenesis. The canonical MAPK pathway involves activation of the RAS GTPase and RAF kinases, and then sequential activation of MAPKKK (MAP3K) and MAPKK (MAP2K) kinases leading to MAPK activation. Activating mutations of *RAS* and *RAF*, and inactivation/repression of endogenous regulators of *RAS* such as *RASSF1* and *DAB2* are common in many cancers including HCC [47,48]. STRING analysis showed that *SOCS1* is directly connected to this pathway through *HRAS* and *SOCS3* with both *HRAS* and *KRAS* (Supplementary Figure S5A). Of the twenty-six oncogenic drivers of this pathway, *SOCS1* showed strong mutual exclusivity with eight genes including *RAF1*, *BRAF*, *MAP2K5*, *MAP3K2*, *MAPK1* (ERK2), *MAPK6* (ERK3), *MAPK8* (JNK1) and *MAPK14* (p38 SAPK), some of which also showed negative correlation with *SOCS3* (Figure 5A). Many of these negatively correlated genes are highly expressed in HCC across the disease spectrum (Figure 5B, Supplementary Figure S5B), but the expression of only *MAPK1* and *BRAF*, and *MAP3K4* demonstrate the ability to predict patient survival (Figure 5C). Intriguingly, *SOCS1* showed a



strong positive correlation with *HRAS* and *SOCS3* with *KRAS*, and both with *RASSF1*, *DAB2* and *MAPK3* (ERK1) (Figure 5A).

### 3.6. *PI3K-AKT-MTOR Signaling pathway*

A key growth-promoting pathway in normal and cancer cells is the PI3K-AKT-MTOR pathway that is deregulated in multiple cancers including HCC and is considered an important target for therapy [49-51]. Activation of the mechanistic target of rapamycin (MTOR, previously called mammalian TOR) occurs via PI3K-AKT pathway downstream of growth factor and cytokine signaling. Therefore, we examined in the TCGA-LIHC dataset the relationship between *SOCS1/SOCS3* expression and a select set of 17 genes of this pathway that are most frequently deregulated in cancers (Figure 6A). STRING analysis revealed that only *SOCS1* is related to this pathway through *PIK3R1*, the regulatory subunit of PI3K (Supplementary Figure S6A). Nonetheless, 5 of these 17 genes showed a negative correlation with both *SOCS1* and *SOCS3* (*PIK3R1*, *PDPK1*, *RPTOR*, *PTEN*, *AKT2*), with *PIK3R1* showing the strongest mutual exclusivity. Additionally, *TSC1*, *MTOR*, and *PIK3CA* revealed a negative correlation only with *SOCS1* whereas *AKT1S1*, *TSC2*, and *MLST8* showed mutual exclusivity only with *SOCS3*, making PI3K-AKT-MTOR pathway the most closely related to *SOCS1/3* (Supplementary Table 1, Figure 7). Notably, *PIK3CA* (the catalytic subunit of PI3K) showed mutual exclusivity with *SOCS1* but co-occurrence with *SOCS3*, whereas *AKT1S1*, which is a target of AKT, showed an inverse relationship (Figure 6A).

Among the eleven PI3K-AKT-MTOR pathway genes negatively correlated with *SOCS1/SOCS3*, all except *PIK3CA* and *PIK3R1* showed significantly elevated expression in HCC tumors compared to normal liver tissue (Figure 6B, Supplementary Figure S6B). Most of these genes also showed significant predictive value, with high expression associated with poor survival (Figure 6C). Intriguingly, elevated expression of *PIK3R1*, which showed a negative correlation with *SOCS1* and *SOCS3*, was associated with a better disease outcome (Figure 6C).

### 3.7. *Predictive potential of oncogenic signaling genes inversely correlated to SOCS1 and SOCS3 and their validation in experimental animal and cellular models*

As *SOCS1* and *SOCS3* are tumor suppressors implicated in regulating cytokine and growth factor signaling pathways, we expected a predominantly inverse correlation between *SOCS1/SOCS3* and oncogenic signaling pathway genes implicated in HCC. However, this was only observed within the PI3K-AKT-MTOR pathway (Figure 7; Supplementary Table 1). Surprisingly, a larger proportion of the oncogenic signaling pathway genes showed a positive correlation with *SOCS1* and/or *SOCS3* (Figure 7; Supplementary Table 1). Among the genes that showed a negative correlation with *SOCS1* and/or *SOCS3*, ten genes displayed independent predictive potential and showed upregulation in tumor tissue, with the exception of *PIK3R1* (Table 1).

Next, we used mice lacking *SOCS1* or *SOCS3* in hepatocytes to validate key oncogenic signaling pathway genes that negatively correlated with *SOCS1* or *SOCS3* in the TCGA-LIHC

dataset. Unlike the TCGA-LIHC data, wherein the elevated expression of *SOCS1* or *SOCS3* could result from cells other than hepatocytes, the knockout mice offer the advantage of hepatocyte-specific loss of *SOCS1* or *SOCS3* expression. Physiological hepatocyte proliferation was induced in *Socs1<sup>fl/fl</sup>Alb<sup>Cre</sup>*, *Socs3<sup>fl/fl</sup>Alb<sup>Cre</sup>* and *Socs1<sup>fl/fl</sup>Socs3<sup>fl/fl</sup>* control mice by partial hepatectomy (PH), and gene expression was evaluated in regenerating livers 24h later (Figure 8A). To study pathological hepatocyte proliferation, HCC was induced in hepatocyte-specific *SOCS1*- or *SOCS3*- deficient mice using the hepatocarcinogen diethyl nitrosamine (DEN; Figure 8B). Liver tumor nodules and adjacent non-tumor tissues were obtained 8-10 months after DEN injection and were evaluated for gene expression. Additionally, the murine HCC cell line Hepa1-6 stably expressing *SOCS1* (Hepa-*SOCS1*), *SOCS3* (Hepa-*SOCS3*) or control vector (Hepa-vector) were exposed to the inflammatory cytokine IL-6 [25], which is implicated hepatocyte proliferation and hepatocarcinogenesis, and induction of the oncogenic signaling genes was evaluated (Figure 8C).

*Cdk2*, which is negatively correlated with *SOCS1* expression in the TCGA dataset, was significantly upregulated in *SOCS1*-deficient liver following PH as well as in DEN-induced HCC and is downregulated in IL-6-stimulated Hepa-*SOCS1* cells. Similarly, *Aurka*, which is negatively correlated with *SOCS3* in the TCGA dataset, was upregulated more than 100-fold in *SOCS3*-deficient, but not in *SOCS1*-deficient liver, following PH and in DEN-induced HCC, and is downregulated in IL-6-stimulated Hepa-*SOCS3* cells (Figure 8A-C). Loss of *SOCS3* in the liver did not affect *Cdk2*, and *Aurka* was not affected by the loss of *SOCS1*. Strikingly both *SOCS3* and *SOCS1* diminished the expression of *Aurka* in Hepa cells (Figure 8C). The diminution of *Cdk2* and *Aurka* in control Hepa-vector in cells could be attributed to the induction of endogenous *SOCS1*, as reported earlier [28]. In contrast to *Aurka*, *Mlst8* and *Map3k4*, which are negatively correlated with *SOCS3* in the TCGA dataset, showed downregulation in Hepa-*SOCS3* cells but were not affected by *SOCS3* deficiency in the regenerating livers or in HCC tissues, although discernible upregulation was observed in the absence of *SOCS1* (Figure 8A-C). *RPTOR*, which is negatively correlated with both *SOCS1* and *SOCS3* in the TCGA dataset, was increased in the regenerating livers lacking *SOCS1* in hepatocytes but not in *SOCS3*-deficient livers. These results show that some of the negative correlations between *SOCS1* or *SOCS3* and the oncogenic signaling pathway genes, notably *CDK2* and *AURKA*, observed in the TCGA dataset are recapitulated in *SOCS1*- or *SOCS3*-deficient murine hepatocytes during physiological and pathological hepatocyte proliferation. Consistent with these results, TCGA-LIHC specimens displaying low *SOCS1*/high *CDK2* and low *SOCS3*/high *AURKA* expression displayed poor prognosis compared to low *SOCS1*/low *CDK2* and low *SOCS3*/low *AURKA* groups (Figure 8D).

### 3.8. Impact of oncogenic signaling genes on the predictive potential of *SOCS1* and *SOCS3*

Next, we carried out a systematic analysis of the predictive potential of *SOCS1* and *SOCS3* when combined with the expression levels of each of the oncogenic signaling pathway genes using the Cox proportional hazards model (Table 2). Even though a high expression of many oncogenic signaling pathway genes independently predicted poor survival (Supplementary

Table 1) and some of them showed a better prognostic potential when combined with *SOCS1/SOCS3* (*CDK2* and *AURKA*; Figure 8D), the Cox model revealed a different set of genes with prognostic potential (Table 2). Notably, low *SOCS1* displayed a significant predictive potential when combined with *CDK1*, *CXCL8*, *CSF1*, *DAB2* and *TSC1*. Among them, *CXCL8* and *DAB2* also predicted poor survival in combination with low *SOCS3*, even though the latter did not display independent predictive ability. On the other hand, high *SOCS1* expression showed limited synergy with most other genes in predicting better survival (Supplementary Table 1, Table 2). Notably, high *SOCS1* even lost its good prognosis in tumors with high *E2F7*, which independently predicts poor survival, or with low *OPCML*, which is a tumor suppressor [52] but has no predictive ability of its own. A similar scenario was observed for *SOCS3* (Table 2). Moreover, only very few genes that show inverse expression levels with *SOCS1/SOCS3* (*PIK3R1*, *AKT1S1*, *AUKRA*) are represented in the Cox model (Tables 1 and 2). These observations reveal the complexities of using *SOCS1/SOCS3* as predictive biomarkers as they seem to impact on and be influenced by diverse oncogenic pathway genes and highlight the need for testing such predictions in different clinical study cohorts in order to develop a consensus biomarker panel for prognostication and to identify new drug targets.

#### 4. Discussion

Our study has revealed notable differences between published reports on the prognostic utility of specific oncogenic signaling pathway genes in HCC from monocentric studies on the one hand, and the multicentric TCGA-LIHC dataset on the other. For example, epigenetic repression of the *SOCS1* gene reported in several studies in up to 65% of HCC specimens is not reflected in *SOCS1* mRNA expression within the TCGA dataset, whereas *SOCS3* gene reported being repressed only in 33% of HCC cases showed downregulation in the TCGA data [9-11]. The reasons for this apparent discrepancy between TCGA-LIHC dataset and other published reports on *SOCS* gene expression in HCC are unclear. Whereas methylation data based on a positive PCR product reflects the repressed status of the gene in hepatocytes, it is possible that induction of the *SOCS* gene expression in liver-resident and infiltrating immune cells and hepatic stromal cells by myriad of cytokines and growth factors might contribute to the overall *SOCS1* transcript levels in the TCGA dataset. In support of this possibility, *SOCS1* mRNA expression positively correlated with *CD247* (CD3 zeta chain, all T cells), *CD8A* (CD8<sup>+</sup> T cells), *NCAMI* (CD56, NK cells) and *IFNG* (activated T and NK cells) (data not shown). Nonetheless, even though *SOCS1* mRNA expression was not significantly different between tumor and normal tissues, higher transcript levels strongly correlated with patient survival (Figure 1C), highlighting the potential prognostic utility of *SOCS1* expression in HCC.

The positive correlations in the expression of *SOCS1/SOCS3* and the oncogenic signaling pathway genes may result from the induction of intact *SOCS1* and *SOCS3* genes as a negative feedback loop to control oncogenic signaling. On the other hand, the negative correlations could arise either from increased oncogenic signaling due to reduced *SOCS1/SOCS3* expression, or from reduced oncogenic signaling due to increased *SOCS1/SOCS3* expression.

Moreover, *SOCS1* and *SOCS3* might target certain transcriptional activators or repressors as substrate specific adaptors in ubiquitin-mediated proteasomal degradation. Thus, the loss of *SOCS1* or *SOCS3* expression may also affect gene expression indirectly. In the following paragraphs, we discuss the impact of genes that show a negative correlation with *SOCS1* and *SOCS3* on HCC pathogenesis.

#### 4.1. Cell Cycle Regulation

As in other cancers, uncontrolled cell cycle progression is a key feature of HCC that results from aberrant expression of cell cycle proteins and/or their regulators [53]. Among the cell cycle genes that showed a negative correlation with *SOCS1/SOCS3*, *CDK2* and *E2F8* are independent predictors of poor survival (Figure 2B). After the initiation of the cell cycle by growth factor-induced activation of cyclin D1/CDK4/6 complexes, the cyclin E/CDK2 activity induced at the G1/S phase boundary is critical for phosphorylating the retinoblastoma protein (RB) and to relieve E2F transcription factors from inhibition to induce the other genes needed for cell cycle progression [53]. Under conditions of increased cyclin D1 availability, for example from increased growth factor signaling, CDK2 promotes hepatocyte proliferation. CDK2 is needed for the initiation of HCC, although not for progression as HCC may acquire CDK2 independence [54-56]. CDK2 and other CDKs are considered potential therapeutic targets in many cancers including HCC [57]. While high *CDK2* expression correlated with poor survival in our study, Sonntag et al., [55] did not find significant prognostic value for *CDK2*, possibly because the latter used the median value to separate the low and high expression groups, whereas in our study we compared the high one-quartile group and the remaining with low/medium expression.

The E2F family transcription factors are critical regulators of the cell cycle and include transcriptional activators (E2F1-3) and transcriptional repressors, which are either typical (E2F4-6) or atypical (E2F7,8). However, the atypical E2F8 is also implicated in promoting E2F1 transcription in HCC pathogenesis and is considered a potential therapeutic target [58-60]. High *E2F8* transcript levels inversely correlate with *SOCS3* expression and predict poor survival (Figure 2C). It is noteworthy that the expression of *CDK2* and *E2F8* are significantly increased during HCC progression (Supplementary Figure S2B). Understanding how *SOCS1* and *SOCS3* influence *CDK2* and *E2F8* expression, respectively, could lead to finding ways to block their oncogenic activities in HCC.

Other cell cycle genes *STAT5B*, *CDK6*, *RBL2*, *CCND1*, *CDKN1B* and *E2F1* that are inversely correlated to *SOCS1/SOCS3* expression are implicated in HCC initiation, progression or both in preclinical models that are also supported by clinical data [61-66]. However, none of these genes show independent prognostic value within the TCGA-LIHC dataset. On the other hand, several cell cycle pathway genes with either positive correlation or no correlation to *SOCS1* displayed independent ability to predict poor survival (Supplementary Table 1, Figure 7). Multivariate analysis of all the cell cycle genes showed that high *CDK1* expression displayed synergistic predictive potential with low *SOCS1*, or even with high *SOCS3* levels

(Table 2). It is noteworthy that CDK1 promotes activation of the  $\beta$ -catenin signaling pathway in cancer stem cells and that inhibiting CDK1 increased the efficacy of Sorafenib in a preclinical model [67]. Whether low *SOCS1* and high *CDK1* together predict aggressive HCC that would be responsive to such targeted therapy could be assessed, even retrospectively, in human study cohorts.

#### **4.2. RTK signaling and angiogenesis pathways**

RTK signaling in hepatocytes and endothelial cells is a key promoter of HCC pathogenesis [2,33,68]. Indeed, deregulation of this pathway by genomic alterations is over-represented in the TCGA-LIHC dataset, and drugs targeting this pathway such as Sorafenib and Regorafenib are already being used or in advanced clinical trials [2,6,69]. However, it is widely perceived that drug choice based on biomarker analysis could improve the treatment outcome. Key RTK signaling/angiogenesis genes *MET*, *ERBB2*, *KDR* and *EGFR*, all implicated in HCC [36,70-73], negatively correlate with *SOCS1*, and the first two with *SOCS3* as well. Deregulated EGFR and KDR signaling can contribute to Sorafenib resistance in advanced HCC [72,74]. However, none of these four genes were able to independently predict patient survival within the TCGA-LIHC dataset (Figure 3C). This notion is supported by the failure of MET-targeting therapeutics to improve survival outcome that has been recently attributed, at least partly, to the ability of kinase-inhibited MET to promote cell survival via promoting autophagy [75]. Even though *MET* expression alone was not predictive, *ERBB3*, which contributes to the resistance to MET inhibition [76] displayed a high predictive potential (Supplementary Table 1). Similarly, even though *KDR* was not predictive, its ligand *VEGFA* showed a very strong predictive potential (Figure 3C). These findings identify *ERBB3* and *VEGFA* as potential biomarkers for targeted therapies.

CXCL8 (IL-8), a chemokine secreted by inflammatory cells including activated HSCs, induces angiogenic growth factors such as *VEGFA* in HCC cells and promotes angiogenesis [77-79]. Strikingly, *CXCL8*, which shows a strong negative prognosis in HCC, displayed marked synergy with low *SOCS1* or *SOCS3* in multivariate analysis (Table 2), suggesting the potential use of these markers together. Indeed, CXCL8 receptor (*CXCR1*, *CXCR2*) antagonists [80] could be an important addition to targeted therapeutics in HCC.

#### **4.3. Other growth factors/proliferation signaling pathways and telomerase maintenance**

Among the other growth stimulatory pathways, CSF1-CSFR1 signaling is implicated in promoting HCC via tumor-associated macrophages, and inhibition of this pathway is considered an important strategy for immunotherapy of HCC [39,81]. Indeed, among the other growth factors, only *CSF1* (though not *CSF1R*) displayed a very high predictive value (Supplementary Table 1). Both *SOCS1* and *SOCS3* expression show a high positive correlation with *CSF1* and *CSF1R*. *SOCS1* has been shown to interact with *CSF1R* and regulate its signaling pathways in cellular systems [82] that are captured in the STRING pathway, which also indicates that *SOCS1* and *SOCS3* could also be indirectly linked to *CSF1* (Supplementary Figure 4A). The IGF1-IGF1R system is implicated in the pathogenesis of many cancers. In

HCC, IGF1 is downregulated and IGF2 and IGF1R are upregulated, and the latter can form heterodimeric receptors with insulin receptor subunits that bind IGF2 to provide mitogenic signals [42]. However, *IGF1R* did not have a prognostic capacity. Similarly, FGFR1 signaling, which contributes to resistance to MET inhibition [41], also had no independent predictive value. The only gene within the other proliferation signaling pathway that showed prognostic potential was *AURKA*, which promotes centrosome duplication and cytokinesis at the G2/M phase of the cell cycle. *AURKA* is a biomarker for HCC development and progression and is a potential target for therapy [83,84]. *AURKA* expression is dramatically high in TCGA-LIHC dataset, with a significantly increased expression as the disease progresses, and displays a strong predictive ability for disease outcome (Figure 4B, 4C, Supplementary Figure S4B, Tables 1 and 2). *AURKA* expression is negatively correlated to *SOCS3*, even though STRING analysis does not reveal any relationship between the two proteins (Supplementary Fig S4A). The negative regulation of *AURKA* by *SOCS3* is also highlighted by a more than 100-fold increase in the expression of *Aurka* in the regenerating livers of hepatocyte-specific *SOCS3*-deficient mice, and significant upregulation of this gene in liver tumors induced in these mice (Figure 8A, 8B). One possible mechanism by which *SOCS3* could modulate *AURKA* expression could be via p53, which represses *AURKA* [85]. Indeed, an earlier study reported frequent *AURKA* overexpression in HCC that was associated with p53 mutation [86]. *SOCS3* can promote transcriptional activation of p53 [22]. Whether *SOCS3* can also modulate the repressive function of p53 is not known. It is noteworthy that high *AURKA* expression can occur even with high *SOCS3* expression, which together predict poor prognosis in multivariate analysis (Table 2). However, *SOCS1*, which was shown to activate p53 earlier [87,88], did not correlate with *AURKA* expression in the TCGA dataset. Clearly, further studies are needed to elucidate the mutual exclusivity of *SOCS3* and *AURKA* expression in HCC.

#### **4.4. RAS-RAF-MAPK signaling pathways**

The RAS-RAF-MAPK pathway is frequently perturbed in HCC and thus is an important therapeutic target [89]. Indeed, the RAF kinase is a key target of Sorafenib that is already used in HCC therapy. Whereas BRAF mutations are commonly found in cholangiocarcinoma but not in HCC, immunohistochemical analysis of HCC specimens in a Chinese cohort identified RAF1 but not ERK to have a prognostic value [90,91]. On the other hand, our study on the TCGA-LIHC dataset revealed that *BRAF* as well as *MAPK1* (ERK2), which show mutual exclusivity with both *SOCS1* and *SOCS3*, display significant predictive value (Figure 5). Similarly, *MAP3K4* (MEKK4), which is inversely correlated to *SOCS3* expression, is also highly predictive of poor survival.

Several genes of the RAS-RAF-MAPK pathway that are coordinately regulated with *SOCS1* and/or *SOCS3* also displayed strong predictive ability in the TCGA dataset (Supplementary Table 1). Of these, those involved in the negative regulation of the RAS-RAF-MAPK pathway have been reported to have a predictive potential [47,48,92]. Members of the RAS association domain family (RASSF) of RAS inhibitors (RASSF1A, RASSF2A and RASSF5 (NORE1A, NORE1B) that inhibit RAS activity), RASAL1 that

inhibits RAS activity by promoting the intrinsic GTPase activity, and SPRED1 and SPRED2 that inhibit RAF kinases are frequently repressed by promoter methylation in HCC [47,48,92]. DAB2, which attenuates the RAS activation downstream of RTK signaling by binding to GRB2 and dissociating its interaction with SOS1, is also repressed by promoter methylation [47] and showed coordinate regulation with *SOCS1* and *SOCS3*. As promoter hypermethylation also represses *SOCS1* and *SOCS3*, it is possible that epigenetic repression of both *SOCS* genes as well as the endogenous negative regulators the RAS-RAF-MAPK pathway likely contributes to their coordinate regulation that amplifies the proliferation and anti-apoptotic functions of this way, contributing to HCC pathogenesis.

Surprisingly, high expression of *RASSF1* and *DAB2* predicted poor survival in the TCGA-HCC dataset (Supplementary Table 1), instead of a better prognosis expected of their function as negative regulators of the RAS-MAPK pathway. High *DAB2* expression within low *SOCS1* or *SOCS3* expressing subgroups also predicted poor overall survival (Table 2). The reason for this apparent discrepancy is unclear. It is possible that the upregulation of *RASSF1* and *DAB2* may result from mutations that disrupt the normal functions of these tumor suppressors, as in the case of mutant p53, which is highly expressed in many cancers [93]. However, only a negligible proportion of cases in the TCGA dataset revealed mutations for *RASSF1* or *DAB2* (data not shown). It is equally possible that their increased expression could result from a compensatory increase in response to the increased activity of this pathway or mutations in their target proteins. Clearly further studies are needed to resolve this conundrum.

#### 4.5. *PI3K-AKT-MTOR Signaling pathway*

The MTOR pathway is frequently activated in HCC and is associated with poor prognosis [51]. Our findings reveal that out of eleven genes of the PI3K-AKT-MTOR pathway driver genes analyzed for survival analysis, *RPTOR*, *PIK3CA*, *TSC1*, *MLST8* and *AKT1S1* showed a pronounced negative impact on patient survival whereas *PIK3R1* showed favorable impact (Figure 6C), raising the possibility of using these genes as prognostic markers. Whereas low *PIK3R1* synergized with low *SOCS1* to predict poor survival as expected, paradoxically, cases with low *SOCS1* and high *AKT1S1* (a key substrate of AKT in the MTOR signaling pathway) showed better survival (Table 2) for obscure reasons. Both *SOCS1* and *SOCS3* have been implicated in regulating the PI3K-AKT pathway upstream of MTOR. By virtue of their ability to promote ubiquitination and proteasomal degradation of insulin receptor substrates 1 and 2 (*IRS1*, *IRS2*), which link RTK signaling to PI3K, *SOCS1* and *SOCS3* can regulate AKT activation in the context of insulin resistance in the liver and other organs [94-96]. We have shown that *SOCS1*-deficient primary hepatocytes show increased AKT activation in response to HGF [28]. *SOCS3* knockdown in endothelial cells increases proliferation and sprouting through activation of the MTOR pathway [97]. Even though *SOCS1*/*SOCS3*-mediated attenuation of AKT activation could result from the inhibition of RTK signaling, the STRING analysis connects *SOCS1* to the PI3K-AKT-MTOR pathway via *PIK3R1* (Supplementary Figure 6A) that was based on a large-scale yeast two-hybrid screen for phosphor-tyrosine-dependent protein interactions and mass spectrometry [98,99]. Recently, the

Fraternali lab has placed *SOCS1* and *PIK3R1* within a network of many RTKs including *MET* and *ERBB2* through an analysis method called short loop motif profiling [100]. Our findings show that the expression of both *SOCS1* and *SOCS3* show a high degree of mutual exclusivity with *PIK3R1* (Figure 6A). Even though this gene codes for the p85 regulatory subunit of PI3K, there is strong evidence indicating its role also as a tumor suppressor by positively modulating *PTEN*, a negative regulator of the PI3K pathway, and by modulating *AKT* and *STAT3* activation [101-103]. Consistent with this, high *PIK3R1* predicts favorable survival, whereas its lower expression in synergy with low *SOCS1* predicts poor survival (Table 2). Given the tumor suppressor functions and overlapping mechanisms of action of *SOCS1*, *SOCS3* and *PIK3R1*, further work is needed to disentangle the highly significant negative correlation between *SOCS1/SOCS3* and *PIK3R1*.

## 5. Conclusions

The most significant outcomes of our study are (i) the prognostic significance of *SOCS1* gene expression in HCC either alone or in combination with certain other genes, and (ii) the discordant data on the predictive potential of certain biomarkers reported earlier within the TCGA-HCC dataset. Clearly, further studies in other cohorts are needed to confirm or contradict these findings. Besides, we observed coordinated expression of several oncogenic signaling pathway genes and *SOCS1/SOCS3*, presumably reflecting activation of negative feedback loops. However, nearly half of the PI3K-AKT-MTOR pathway genes showed mutual exclusivity with *SOCS1/SOCS3*, suggesting the loss of SOCS-dependent regulation of RTKs contributing to the increased activity of this signaling pathway. Finally, our study identified at least three genes, *RASSF1* and *DAB2* in the RAS-RAF-MAPK pathway and *PIK3R1* in the PI3K-AKT-MTOR pathway that showed a predictive value opposite of their expected functions, indicating a need for further investigations. Collectively, *SOCS1* and certain key genes of the oncogenic signaling pathways that show high predictive value in this study could be developed as combination biomarkers for patient-oriented precision therapeutics in HCC.

**Author Contributions:** Conceptualization, M.K., S.R., and S.I.; Data Analysis and interpretation, M.K., M.R., B.V., A.I., and A.G.; Experiments, M.K., and A.G.; Manuscript drafting and editing, M.K., M.R., S.R., and S.I. All authors have read the manuscript and approved the final version.

**Funding:** This work is supported by the project grant PJT-153174 from the Canadian Institutes of Health Research to SI.

**Acknowledgments:** MK was supported by doctoral scholarship from FRQNT. MR is supported by the ‘Abdenour-Nabid’ and AI by the ‘VoiceAge’ graduate fellowships of the Faculty of Medicine, Université de Sherbrooke. AG is a recipient of postdoctoral fellowship from FRQS. We thank Ms Marie-Pierre Garant of the CRCHUS for the Cox proportional hazard analysis.



**Conflicts of Interest:** The authors declare no conflict of interest.

### Supplementary Material

**Figure S1.** Workflow of this study.

**Figure S2.** Cell cycle regulation genes: interactions with *SOCS1* and *SOCS3*, and expression across the tumor grades in TCGA-LIHC dataset.

**Figure S3.** RTK signaling and angiogenesis pathway genes: interactions with *SOCS1* and *SOCS3*, and expression across the tumor grades in TCGA-LIHC dataset.

**Figure S4.** Other growth signaling pathway genes: interactions with *SOCS1* and *SOCS3*, and expression across the tumor grades in TCGA-LIHC dataset.

**Figure S5.** RAS-RAF-MEK-MAPK pathway genes: interactions with *SOCS1* and *SOCS3*, and expression across the tumor grades in TCGA-LIHC dataset.

**Figure S6.** PI3K-AKT-MTOR pathway genes: interactions with *SOCS1* and *SOCS3*, and expression across the tumor grades in TCGA-LIHC dataset.

**Table S1.** Impact of the expression of oncogenic pathway genes on survival probability in the TCGA-LIHC dataset.

### References

1. Torre, L.A.; Bray, F.; Siegel, R.L.; Ferlay, J.; Lortet-Tieulent, J.; Jemal, A. Global cancer statistics, 2012. *CA Cancer J Clin* **2015**, *65*, 87-108, doi:10.3322/caac.21262.
2. Llovet, J.M.; Villanueva, A.; Lachenmayer, A.; Finn, R.S. Advances in targeted therapies for hepatocellular carcinoma in the genomic era. *Nat Rev Clin Oncol* **2015**, *12*, 408-424, doi:10.1038/nrclinonc.2015.103.
3. Kudo, M. Targeted and immune therapies for hepatocellular carcinoma: Predictions for 2019 and beyond. *World J Gastroenterol* **2019**, *25*, 789-807, doi:10.3748/wjg.v25.i7.789.
4. Fausto, N.; Campbell, J.S. Mouse models of hepatocellular carcinoma. *Semin Liver Dis* **2010**, *30*, 87-98, doi:10.1055/s-0030-1247135.
5. Liu, Y.F.; Zha, B.S.; Zhang, H.L.; Zhu, X.J.; Li, Y.H.; Zhu, J.; Guan, X.H.; Feng, Z.Q.; Zhang, J.P. Characteristic gene expression profiles in the progression from liver cirrhosis to carcinoma induced by diethylnitrosamine in a rat model. *J Exp Clin Cancer Res* **2009**, *28*, 107, doi:10.1186/1756-9966-28-107.
6. Cancer Genome Atlas Research Network. Electronic address, w.b.e.; Cancer Genome Atlas Research, N. Comprehensive and Integrative Genomic Characterization of Hepatocellular Carcinoma. *Cell* **2017**, *169*, 1327-1341 e1323, doi:10.1016/j.cell.2017.05.046.
7. Xue, R.; Chen, L.; Zhang, C.; Fujita, M.; Li, R.; Yan, S.M.; Ong, C.K.; Liao, X.; Gao, Q.; Sasagawa, S., et al. Genomic and Transcriptomic Profiling of Combined Hepatocellular and Intrahepatic Cholangiocarcinoma Reveals Distinct Molecular Subtypes. *Cancer Cell* **2019**, *35*, 932-947 e938, doi:10.1016/j.ccell.2019.04.007.
8. Zhang, B.; Finn, R.S. Personalized Clinical Trials in Hepatocellular Carcinoma Based on Biomarker Selection. *Liver Cancer* **2016**, *5*, 221-232, doi:10.1159/000367763.

9. Yoshikawa, H.; Matsubara, K.; Qian, G.S.; Jackson, P.; Groopman, J.D.; Manning, J.E.; Harris, C.C.; Herman, J.G. SOCS-1, a negative regulator of the JAK/STAT pathway, is silenced by methylation in human hepatocellular carcinoma and shows growth- suppression activity. *Nat Genet* **2001**, *28*, 29-35.
10. Yang, B.; Guo, M.; Herman, J.G.; Clark, D.P. Aberrant promoter methylation profiles of tumor suppressor genes in hepatocellular carcinoma. *Am J Pathol* **2003**, *163*, 1101-1107, doi:10.1016/S0002-9440(10)63469-4.
11. Niwa, Y.; Kanda, H.; Shikauchi, Y.; Saiura, A.; Matsubara, K.; Kitagawa, T.; Yamamoto, J.; Kubo, T.; Yoshikawa, H. Methylation silencing of SOCS-3 promotes cell growth and migration by enhancing JAK/STAT and FAK signalings in human hepatocellular carcinoma. *Oncogene* **2005**, *24*, 6406-6417.
12. Ilangumaran, S.; Ramanathan, S.; Rottapel, R. Regulation of the immune system by SOCS family adaptor proteins. *Semin Immunol* **2004**, *16*, 351-365.
13. Taub, R. Liver regeneration: from myth to mechanism. *Nat Rev Mol Cell Biol* **2004**, *5*, 836-847.
14. Farazi, P.A.; DePinho, R.A. Hepatocellular carcinoma pathogenesis: from genes to environment. *Nature reviews. Cancer* **2006**, *6*, 674-687, doi:10.1038/nrc1934.
15. Whittaker, S.; Marais, R.; Zhu, A.X. The role of signaling pathways in the development and treatment of hepatocellular carcinoma. *Oncogene* **2010**, *29*, 4989-5005.
16. Yoshida, T.; Ogata, H.; Kamio, M.; Joo, A.; Shiraishi, H.; Tokunaga, Y.; Sata, M.; Nagai, H.; Yoshimura, A. SOCS1 is a suppressor of liver fibrosis and hepatitis-induced carcinogenesis. *J Exp Med* **2004**, *199*, 1701-1707.
17. Yeganeh, M.; Gui, Y.; Kandhi, R.; Bobbala, D.; Tobelaim, W.S.; Saucier, C.; Yoshimura, A.; Ferbeyre, G.; Ramanathan, S.; Ilangumaran, S. Suppressor of cytokine signaling 1-dependent regulation of the expression and oncogenic functions of p21(CIP1/WAF1) in the liver. *Oncogene* **2016**, *35*, 4200-4211, doi:10.1038/onc.2015.485.
18. Ogata, H.; Kobayashi, T.; Chinen, T.; Takaki, H.; Sanada, T.; Minoda, Y.; Koga, K.; Takaesu, G.; Maehara, Y.; Iida, M., et al. Deletion of the SOCS3 gene in liver parenchymal cells promotes hepatitis-induced hepatocarcinogenesis. *Gastroenterology* **2006**, *131*, 179-193.
19. Riehle, K.J.; Campbell, J.S.; McMahan, R.S.; Johnson, M.M.; Beyer, R.P.; Bammler, T.K.; Fausto, N. Regulation of liver regeneration and hepatocarcinogenesis by suppressor of cytokine signaling 3. *J Exp Med* **2008**, *205*, 91-103.
20. Kandhi, R.; Bobbala, D.; Yeganeh, M.; Mayhue, M.; Menendez, A.; Ilangumaran, S. Negative regulation of the hepatic fibrogenic response by suppressor of cytokine signaling 1. *Cytokine* **2016**, *82*, 58-69, doi:10.1016/j.cyto.2015.12.007.
21. Mafanda, E.K.; Kandhi, R.; Bobbala, D.; Khan, M.G.M.; Nandi, M.; Menendez, A.; Ramanathan, S.; Ilangumaran, S. Essential role of suppressor of cytokine signaling 1 (SOCS1) in hepatocytes and macrophages in the regulation of liver fibrosis. *Cytokine* **2018**, 10.1016/j.cyto.2018.07.032, doi:10.1016/j.cyto.2018.07.032.

22. Kong, X.; Feng, D.; Wang, H.; Hong, F.; Bertola, A.; Wang, F.S.; Gao, B. Interleukin-22 induces hepatic stellate cell senescence and restricts liver fibrosis in mice. *Hepatology* **2012**, *56*, 1150-1159, doi:10.1002/hep.25744.
23. Khan, M.G.M.; Ghosh, A.; Variya, B.; Santharam, M.A.; Kandhi, R.; Ramanathan, S.; Ilangumaran, S. Hepatocyte growth control by SOCS1 and SOCS3. *Cytokine* **2019**, *121*, 154733, doi:10.1016/j.cyto.2019.154733.
24. Gui, Y.; Yeganeh, M.; Donates, Y.C.; Tobelaim, W.S.; Chababi, W.; Mayhue, M.; Yoshimura, A.; Ramanathan, S.; Saucier, C.; Ilangumaran, S. Regulation of MET receptor tyrosine kinase signaling by suppressor of cytokine signaling 1 in hepatocellular carcinoma. *Oncogene* **2015**, *34*, 5718-5728, doi:10.1038/onc.2015.20.
25. Naugler, W.E.; Sakurai, T.; Kim, S.; Maeda, S.; Kim, K.; Elsharkawy, A.M.; Karin, M. Gender disparity in liver cancer due to sex differences in MyD88-dependent IL-6 production. *Science* **2007**, *317*, 121-124, doi:10.1126/science.1140485.
26. Seki, E.; Kondo, Y.; Iimuro, Y.; Naka, T.; Son, G.; Kishimoto, T.; Fujimoto, J.; Tsutsui, H.; Nakanishi, K. Demonstration of cooperative contribution of MET- and EGFR-mediated STAT3 phosphorylation to liver regeneration by exogenous suppressor of cytokine signaling. *Journal of hepatology* **2008**, *48*, 237-245.
27. Zhou, M.; Yang, H.; Learned, R.M.; Tian, H.; Ling, L. Non-cell-autonomous activation of IL-6/STAT3 signaling mediates FGF19-driven hepatocarcinogenesis. *Nat Commun* **2017**, *8*, 15433, doi:10.1038/ncomms15433.
28. Gui, Y.; Yeganeh, M.; Ramanathan, S.; Leblanc, C.; Pomerleau, V.; Ferbeyre, G.; Saucier, C.; Ilangumaran, S. SOCS1 controls liver regeneration by regulating HGF signaling in hepatocytes. *Journal of hepatology* **2011**, *55*, 1300-1308.
29. Sanchez-Vega, F.; Mina, M.; Armenia, J.; Chatila, W.K.; Luna, A.; La, K.C.; Dimitriadou, S.; Liu, D.L.; Kantheti, H.S.; Saghafeinia, S., et al. Oncogenic Signaling Pathways in The Cancer Genome Atlas. *Cell* **2018**, *173*, 321-337 e310, doi:10.1016/j.cell.2018.03.035.
30. Endo, T.A.; Masuhara, M.; Yokouchi, M.; Suzuki, R.; Sakamoto, H.; Mitsui, K.; Matsumoto, A.; Tanimura, S.; Ohtsubo, M.; Misawa, H., et al. A new protein containing an SH2 domain that inhibits JAK kinases. *Nature* **1997**, *387*, 921-924.
31. Naka, T.; Narazaki, M.; Hirata, M.; Matsumoto, T.; Minamoto, S.; Aono, A.; Nishimoto, N.; Kajita, T.; Taga, T.; Yoshizaki, K., et al. Structure and function of a new STAT-induced STAT inhibitor. *Nature* **1997**, *387*, 924-929.
32. Starr, R.; Willson, T.A.; Viney, E.M.; Murray, L.J.; Rayner, J.R.; Jenkins, B.J.; Gonda, T.J.; Alexander, W.S.; Metcalf, D.; Nicola, N.A., et al. A family of cytokine-inducible inhibitors of signalling. *Nature* **1997**, *387*, 917-921.
33. Huynh, H.; Ong, R.W.; Li, P.Y.; Lee, S.S.; Yang, S.; Chong, L.W.; Luu, D.A.; Jong, C.T.; Lam, I.W. Targeting receptor tyrosine kinase pathways in hepatocellular carcinoma. *Anti-cancer agents in medicinal chemistry* **2011**, *11*, 560-575.
34. Gui, Y.; Yeganeh, M.; Cepero-Donates, Y.; Ramanathan, S.; Saucier, C.; Ilangumaran, S. Regulation of MET receptor signaling by SOCS1 and its implications for hepatocellular carcinoma. *Curr Pharm Des* **2014**, *20*, 2922-2933.

35. Friedman, S.L. Mechanisms of hepatic fibrogenesis. *Gastroenterology* **2008**, *134*, 1655-1669, doi:10.1053/j.gastro.2008.03.003.
36. Giordano, S.; Columbano, A. Met as a therapeutic target in HCC: facts and hopes. *Journal of hepatology* **2014**, *60*, 442-452, doi:10.1016/j.jhep.2013.09.009.
37. Zhu, A.X.; Duda, D.G.; Sahani, D.V.; Jain, R.K. HCC and angiogenesis: possible targets and future directions. *Nat Rev Clin Oncol* **2011**, *8*, 292-301, doi:10.1038/nrclinonc.2011.30.
38. Shibuya, M. Vascular Endothelial Growth Factor (VEGF) and Its Receptor (VEGFR) Signaling in Angiogenesis: A Crucial Target for Anti- and Pro-Angiogenic Therapies. *Genes Cancer* **2011**, *2*, 1097-1105, doi:10.1177/1947601911423031.
39. Ao, J.Y.; Zhu, X.D.; Chai, Z.T.; Cai, H.; Zhang, Y.Y.; Zhang, K.Z.; Kong, L.Q.; Zhang, N.; Ye, B.G.; Ma, D.N., et al. Colony-Stimulating Factor 1 Receptor Blockade Inhibits Tumor Growth by Altering the Polarization of Tumor-Associated Macrophages in Hepatocellular Carcinoma. *Mol Cancer Ther* **2017**, *16*, 1544-1554, doi:10.1158/1535-7163.MCT-16-0866.
40. Sandhu, D.S.; Baichoo, E.; Roberts, L.R. Fibroblast growth factor signaling in liver carcinogenesis. *Hepatology* **2014**, *59*, 1166-1173.
41. Jo, J.C.; Choi, E.K.; Shin, J.S.; Moon, J.H.; Hong, S.W.; Lee, H.R.; Kim, S.M.; Jung, S.A.; Lee, D.H.; Jung, S.H., et al. Targeting FGFR Pathway in Human Hepatocellular Carcinoma: Expressing pFGFR and pMET for Antitumor Activity. *Mol Cancer Ther* **2015**, *14*, 2613-2622, doi:10.1158/1535-7163.MCT-14-0780.
42. Enguita-German, M.; Fortes, P. Targeting the insulin-like growth factor pathway in hepatocellular carcinoma. *World J Hepatol* **2014**, *6*, 716-737, doi:10.4254/wjh.v6.i10.716.
43. Su, Z.L.; Su, C.W.; Huang, Y.L.; Yang, W.Y.; Sampurna, B.P.; Ouchi, T.; Lee, K.L.; Wu, C.S.; Wang, H.D.; Yuh, C.H. A Novel AURKA Mutant-Induced Early-Onset Severe Hepatocarcinogenesis Greater than Wild-Type via Activating Different Pathways in Zebrafish. *Cancers (Basel)* **2019**, *11*, doi:10.3390/cancers11070927.
44. Liu, M.; Yin, K.; Guo, X.; Feng, H.; Yuan, M.; Liu, Y.; Zhang, J.; Guo, B.; Wang, C.; Zhou, G., et al. Diphthamide Biosynthesis 1 is a Novel Oncogene in Colorectal Cancer Cells and is Regulated by MiR-218-5p. *Cell Physiol Biochem* **2017**, *44*, 505-514, doi:10.1159/000485087.
45. Nault, J.C.; Ningarhari, M.; Rebouissou, S.; Zucman-Rossi, J. The role of telomeres and telomerase in cirrhosis and liver cancer. *Nat Rev Gastroenterol Hepatol* **2019**, *10.1038/s41575-019-0165-3*, doi:10.1038/s41575-019-0165-3.
46. Min, L.; He, B.; Hui, L. Mitogen-activated protein kinases in hepatocellular carcinoma development. *Semin Cancer Biol* **2011**, *21*, 10-20, doi:10.1016/j.semcancer.2010.10.011.
47. Calvisi, D.F.; Ladu, S.; Gorden, A.; Farina, M.; Lee, J.S.; Conner, E.A.; Schroeder, I.; Factor, V.M.; Thorgeirsson, S.S. Mechanistic and prognostic significance of aberrant methylation in the molecular pathogenesis of human hepatocellular carcinoma. *J Clin Invest* **2007**, *117*, 2713-2722, doi:10.1172/JCI31457.

48. Delire, B.; Starkel, P. The Ras/MAPK pathway and hepatocarcinoma: pathogenesis and therapeutic implications. *Eur J Clin Invest* **2015**, *45*, 609-623, doi:10.1111/eci.12441.
49. Mayer, I.A.; Arteaga, C.L. The PI3K/AKT Pathway as a Target for Cancer Treatment. *Annu Rev Med* **2016**, *67*, 11-28, doi:10.1146/annurev-med-062913-051343.
50. Zhang, Y.; Kwok-Shing Ng, P.; Kucherlapati, M.; Chen, F.; Liu, Y.; Tsang, Y.H.; de Velasco, G.; Jeong, K.J.; Akbani, R.; Hadjipanayis, A., et al. A Pan-Cancer Proteogenomic Atlas of PI3K/AKT/mTOR Pathway Alterations. *Cancer Cell* **2017**, *31*, 820-832 e823, doi:10.1016/j.ccell.2017.04.013.
51. Matter, M.S.; Decaens, T.; Andersen, J.B.; Thorgeirsson, S.S. Targeting the mTOR pathway in hepatocellular carcinoma: current state and future trends. *Journal of hepatology* **2014**, *60*, 855-865, doi:10.1016/j.jhep.2013.11.031.
52. Cui, Y.; Ying, Y.; van Hasselt, A.; Ng, K.M.; Yu, J.; Zhang, Q.; Jin, J.; Liu, D.; Rhim, J.S.; Rha, S.Y., et al. OPCML is a broad tumor suppressor for multiple carcinomas and lymphomas with frequently epigenetic inactivation. *PLoS One* **2008**, *3*, e2990, doi:10.1371/journal.pone.0002990.
53. Bisteau, X.; Caldez, M.J.; Kaldis, P. The Complex Relationship between Liver Cancer and the Cell Cycle: A Story of Multiple Regulations. *Cancers (Basel)* **2014**, *6*, 79-111, doi:10.3390/cancers6010079.
54. Hanse, E.A.; Nelsen, C.J.; Goggin, M.M.; Anttila, C.K.; Mullany, L.K.; Berthet, C.; Kaldis, P.; Crary, G.S.; Kuriyama, R.; Albrecht, J.H. Cdk2 plays a critical role in hepatocyte cell cycle progression and survival in the setting of cyclin D1 expression in vivo. *Cell Cycle* **2009**, *8*, 2802-2809, doi:10.4161/cc.8.17.9465.
55. Sonntag, R.; Giebeler, N.; Nevzorova, Y.A.; Bangen, J.M.; Fahrenkamp, D.; Lambertz, D.; Haas, U.; Hu, W.; Gassler, N.; Cubero, F.J., et al. Cyclin E1 and cyclin-dependent kinase 2 are critical for initiation, but not for progression of hepatocellular carcinoma. *Proc Natl Acad Sci U S A* **2018**, *115*, 9282-9287, doi:10.1073/pnas.1807155115.
56. Geng, Y.; Michowski, W.; Chick, J.M.; Wang, Y.E.; Jecrois, M.E.; Sweeney, K.E.; Liu, L.; Han, R.C.; Ke, N.; Zagozdzon, A., et al. Kinase-independent function of E-type cyclins in liver cancer. *Proc Natl Acad Sci U S A* **2018**, *115*, 1015-1020, doi:10.1073/pnas.1711477115.
57. Tadesse, S.; Caldon, E.C.; Tilley, W.; Wang, S. Cyclin-Dependent Kinase 2 Inhibitors in Cancer Therapy: An Update. *J Med Chem* **2019**, *62*, 4233-4251, doi:10.1021/acs.jmedchem.8b01469.
58. Deng, Q.; Wang, Q.; Zong, W.Y.; Zheng, D.L.; Wen, Y.X.; Wang, K.S.; Teng, X.M.; Zhang, X.; Huang, J.; Han, Z.G. E2F8 contributes to human hepatocellular carcinoma via regulating cell proliferation. *Cancer Res* **2010**, *70*, 782-791, doi:10.1158/0008-5472.CAN-09-3082.
59. Lv, Y.; Xiao, J.; Liu, J.; Xing, F. E2F8 is a Potential Therapeutic Target for Hepatocellular Carcinoma. *J Cancer* **2017**, *8*, 1205-1213, doi:10.7150/jca.18255.

60. Huang, Y.L.; Ning, G.; Chen, L.B.; Lian, Y.F.; Gu, Y.R.; Wang, J.L.; Chen, D.M.; Wei, H.; Huang, Y.H. Promising diagnostic and prognostic value of E2Fs in human hepatocellular carcinoma. *Cancer Manag Res* **2019**, *11*, 1725-1740, doi:10.2147/CMAR.S182001.
61. Lee, T.K.; Man, K.; Poon, R.T.; Lo, C.M.; Yuen, A.P.; Ng, I.O.; Ng, K.T.; Leonard, W.; Fan, S.T. Signal transducers and activators of transcription 5b activation enhances hepatocellular carcinoma aggressiveness through induction of epithelial-mesenchymal transition. *Cancer Res* **2006**, *66*, 9948-9956, doi:10.1158/0008-5472.CAN-06-1092.
62. Kaltenecker, D.; Themanns, M.; Mueller, K.M.; Spirk, K.; Golob-Schwarzl, N.; Friedbichler, K.; Kenner, L.; Haybaeck, J.; Moriggl, R. STAT5 deficiency in hepatocytes reduces diethylnitrosamine-induced liver tumorigenesis in mice. *Cytokine* **2018**, 10.1016/j.cyto.2018.10.014, doi:10.1016/j.cyto.2018.10.014.
63. Wu, H.; Tao, J.; Li, X.; Zhang, T.; Zhao, L.; Wang, Y.; Zhang, L.; Xiong, J.; Zeng, Z.; Zhan, N., et al. MicroRNA-206 prevents the pathogenesis of hepatocellular carcinoma by modulating expression of met proto-oncogene and cyclin-dependent kinase 6 in mice. *Hepatology* **2017**, *66*, 1952-1967, doi:10.1002/hep.29374.
64. Joo, M.; Kang, Y.K.; Kim, M.R.; Lee, H.K.; Jang, J.J. Cyclin D1 overexpression in hepatocellular carcinoma. *Liver* **2001**, *21*, 89-95.
65. Che, Y.; Ye, F.; Xu, R.; Qing, H.; Wang, X.; Yin, F.; Cui, M.; Burstein, D.; Jiang, B.; Zhang, D.Y. Co-expression of XIAP and cyclin D1 complex correlates with a poor prognosis in patients with hepatocellular carcinoma. *Am J Pathol* **2012**, *180*, 1798-1807, doi:10.1016/j.ajpath.2012.01.016.
66. Deane, N.G.; Parker, M.A.; Aramandla, R.; Diehl, L.; Lee, W.J.; Washington, M.K.; Nanney, L.B.; Shyr, Y.; Beauchamp, R.D. Hepatocellular carcinoma results from chronic cyclin D1 overexpression in transgenic mice. *Cancer Res* **2001**, *61*, 5389-5395.
67. Wu, C.X.; Wang, X.Q.; Chok, S.H.; Man, K.; Tsang, S.H.Y.; Chan, A.C.Y.; Ma, K.W.; Xia, W.; Cheung, T.T. Blocking CDK1/PDK1/beta-Catenin signaling by CDK1 inhibitor RO3306 increased the efficacy of sorafenib treatment by targeting cancer stem cells in a preclinical model of hepatocellular carcinoma. *Theranostics* **2018**, *8*, 3737-3750, doi:10.7150/thno.25487.
68. Nalesnik, M.A.; Michalopoulos, G.K. Growth factor pathways in development and progression of hepatocellular carcinoma. *Front Biosci (Schol Ed)* **2012**, *4*, 1487-1515.
69. Morse, M.A.; Sun, W.; Kim, R.; He, A.R.; Abada, P.B.; Mynderse, M.; Finn, R.S. The Role of Angiogenesis in Hepatocellular Carcinoma. *Clin Cancer Res* **2019**, *25*, 912-920, doi:10.1158/1078-0432.CCR-18-1254.
70. Shi, J.H.; Guo, W.Z.; Jin, Y.; Zhang, H.P.; Pang, C.; Li, J.; Line, P.D.; Zhang, S.J. Recognition of HER2 expression in hepatocellular carcinoma and its significance in postoperative tumor recurrence. *Cancer Med* **2019**, *8*, 1269-1278, doi:10.1002/cam4.2006.
71. Shimamura, T.; Saito, S.; Morita, K.; Kitamura, T.; Morimoto, M.; Kiba, T.; Numata, K.; Tanaka, K.; Sekihara, H. Detection of vascular endothelial growth factor and its

- receptor expression in human hepatocellular carcinoma biopsy specimens. *J Gastroenterol Hepatol* **2000**, *15*, 640-646.
72. Negri, F.V.; Dal Bello, B.; Porta, C.; Campanini, N.; Rossi, S.; Tinelli, C.; Poggi, G.; Missale, G.; Fanello, S.; Salvagni, S., et al. Expression of pERK and VEGFR-2 in advanced hepatocellular carcinoma and resistance to sorafenib treatment. *Liver Int* **2015**, *35*, 2001-2008, doi:10.1111/liv.12778.
73. Berasain, C.; Avila, M.A. The EGFR signalling system in the liver: from hepatoprotection to hepatocarcinogenesis. *J Gastroenterol* **2014**, *49*, 9-23, doi:10.1007/s00535-013-0907-x.
74. Blivet-Van Eggelpoel, M.J.; Chettouh, H.; Fartoux, L.; Aoudjehane, L.; Barbu, V.; Rey, C.; Priam, S.; Housset, C.; Rosmorduc, O.; Desbois-Mouthon, C. Epidermal growth factor receptor and HER-3 restrict cell response to sorafenib in hepatocellular carcinoma cells. *Journal of hepatology* **2012**, *57*, 108-115, doi:10.1016/j.jhep.2012.02.019.
75. Huang, X.; Gan, G.; Wang, X.; Xu, T.; Xie, W. The HGF-MET axis coordinates liver cancer metabolism and autophagy for chemotherapeutic resistance. *Autophagy* **2019**, *15*, 1258-1279, doi:10.1080/15548627.2019.1580105.
76. Steinway, S.N.; Dang, H.; You, H.; Rountree, C.B.; Ding, W. The EGFR/ErbB3 Pathway Acts as a Compensatory Survival Mechanism upon c-Met Inhibition in Human c-Met+ Hepatocellular Carcinoma. *PLoS One* **2015**, *10*, e0128159, doi:10.1371/journal.pone.0128159.
77. Ha, H.; Debnath, B.; Neamati, N. Role of the CXCL8-CXCR1/2 Axis in Cancer and Inflammatory Diseases. *Theranostics* **2017**, *7*, 1543-1588, doi:10.7150/thno.15625.
78. Li, X.P.; Yang, X.Y.; Biskup, E.; Zhou, J.; Li, H.L.; Wu, Y.F.; Chen, M.L.; Xu, F. Co-expression of CXCL8 and HIF-1alpha is associated with metastasis and poor prognosis in hepatocellular carcinoma. *Oncotarget* **2015**, *6*, 22880-22889, doi:10.18632/oncotarget.4412.
79. Zhu, B.; Lin, N.; Zhang, M.; Zhu, Y.; Cheng, H.; Chen, S.; Ling, Y.; Pan, W.; Xu, R. Activated hepatic stellate cells promote angiogenesis via interleukin-8 in hepatocellular carcinoma. *J Transl Med* **2015**, *13*, 365, doi:10.1186/s12967-015-0730-7.
80. Li, L.; Khan, M.N.; Li, Q.; Chen, X.; Wei, J.; Wang, B.; Cheng, J.W.; Gordon, J.R.; Li, F. G31P, CXCR1/2 inhibitor, with cisplatin inhibits the growth of mice hepatocellular carcinoma and mitigates highdose cisplatin-induced nephrotoxicity. *Oncol Rep* **2015**, *33*, 751-757, doi:10.3892/or.2014.3659.
81. Zhu, Y.; Yang, J.; Xu, D.; Gao, X.M.; Zhang, Z.; Hsu, J.L.; Li, C.W.; Lim, S.O.; Sheng, Y.Y.; Zhang, Y., et al. Disruption of tumour-associated macrophage trafficking by the osteopontin-induced colony-stimulating factor-1 signalling sensitises hepatocellular carcinoma to anti-PD-L1 blockade. *Gut* **2019**, *10.1136/gutjnl-2019-318419*, doi:10.1136/gutjnl-2019-318419.
82. Bourette, R.P.; De Sepulveda, P.; Arnaud, S.; Dubreuil, P.; Rottapel, R.; Mouchiroud, G. Suppressor of cytokine signaling 1 interacts with the macrophage

- colony-stimulating factor receptor and negatively regulates its proliferation signal. *J Biol Chem* **2001**, 276, 22133-22139, doi:10.1074/jbc.M101878200.
83. Wang, B.; Hsu, C.J.; Chou, C.H.; Lee, H.L.; Chiang, W.L.; Su, C.M.; Tsai, H.C.; Yang, S.F.; Tang, C.H. Variations in the AURKA Gene: Biomarkers for the Development and Progression of Hepatocellular Carcinoma. *Int J Med Sci* **2018**, 15, 170-175, doi:10.7150/ijms.22513.
84. Dauch, D.; Rudalska, R.; Cossa, G.; Nault, J.C.; Kang, T.W.; Wuestefeld, T.; Hohmeyer, A.; Imbeaud, S.; Yevsa, T.; Hoenicke, L., et al. A MYC-aurora kinase A protein complex represents an actionable drug target in p53-altered liver cancer. *Nat Med* **2016**, 22, 744-753, doi:10.1038/nm.4107.
85. Nikulenkov, F.; Spinnler, C.; Li, H.; Tonelli, C.; Shi, Y.; Turunen, M.; Kivioja, T.; Ignatiev, I.; Kel, A.; Taipale, J., et al. Insights into p53 transcriptional function via genome-wide chromatin occupancy and gene expression analysis. *Cell Death Differ* **2012**, 19, 1992-2002, doi:10.1038/cdd.2012.89.
86. Jeng, Y.M.; Peng, S.Y.; Lin, C.Y.; Hsu, H.C. Overexpression and amplification of Aurora-A in hepatocellular carcinoma. *Clin Cancer Res* **2004**, 10, 2065-2071.
87. Calabrese, V.; Mallette, F.A.; Deschenes-Simard, X.; Ramanathan, S.; Gagnon, J.; Moores, A.; Ilangumaran, S.; Ferbeyre, G. SOCS1 links cytokine signaling to p53 and senescence. *Mol Cell* **2009**, 36, 754-767, doi:10.1016/j.molcel.2009.09.044.
88. Saint-Germain, E.; Mignacca, L.; Huot, G.; Acevedo, M.; Moineau-Vallee, K.; Calabrese, V.; Bourdeau, V.; Rowell, M.C.; Ilangumaran, S.; Lessard, F., et al. Phosphorylation of SOCS1 Inhibits the SOCS1-p53 Tumor Suppressor Axis. *Cancer Res* **2019**, 79, 3306-3319, doi:10.1158/0008-5472.CAN-18-1503.
89. Yang, S.; Liu, G. Targeting the Ras/Raf/MEK/ERK pathway in hepatocellular carcinoma. *Oncol Lett* **2017**, 13, 1041-1047, doi:10.3892/ol.2017.5557.
90. Tannapfel, A.; Sommerer, F.; Benicke, M.; Katalinic, A.; Uhlmann, D.; Witzigmann, H.; Hauss, J.; Wittekind, C. Mutations of the BRAF gene in cholangiocarcinoma but not in hepatocellular carcinoma. *Gut* **2003**, 52, 706-712, doi:10.1136/gut.52.5.706.
91. Chen, L.; Shi, Y.; Jiang, C.Y.; Wei, L.X.; Wang, Y.L.; Dai, G.H. Expression and prognostic role of pan-Ras, Raf-1, pMEK1 and pERK1/2 in patients with hepatocellular carcinoma. *Eur J Surg Oncol* **2011**, 37, 513-520, doi:10.1016/j.ejso.2011.01.023.
92. Calvisi, D.F.; Evert, M.; Dombrowski, F. Pathogenetic and Prognostic Significance of Inactivation of RASSF Proteins in Human Hepatocellular Carcinoma. *Mol Biol Int* **2012**, 2012, 849874, doi:10.1155/2012/849874.
93. Yue, X.; Zhao, Y.; Xu, Y.; Zheng, M.; Feng, Z.; Hu, W. Mutant p53 in Cancer: Accumulation, Gain-of-Function, and Therapy. *J Mol Biol* **2017**, 429, 1595-1606, doi:10.1016/j.jmb.2017.03.030.
94. Rui, L.; Yuan, M.; Frantz, D.; Shoelson, S.; White, M.F. SOCS-1 and SOCS-3 block insulin signaling by ubiquitin-mediated degradation of IRS1 and IRS2. *J Biol Chem* **2002**, 277, 42394-42398, doi:10.1074/jbc.C200444200.



95. Ueki, K.; Kondo, T.; Tseng, Y.H.; Kahn, C.R. Central role of suppressors of cytokine signaling proteins in hepatic steatosis, insulin resistance, and the metabolic syndrome in the mouse. *Proc Natl Acad Sci U S A* **2004**, *101*, 10422-10427, doi:10.1073/pnas.0402511101.
96. Venieratos, P.D.; Drossopoulou, G.I.; Kapodistria, K.D.; Tsilibary, E.C.; Kitsiou, P.V. High glucose induces suppression of insulin signalling and apoptosis via upregulation of endogenous IL-1beta and suppressor of cytokine signalling-1 in mouse pancreatic beta cells. *Cell Signal* **2010**, *22*, 791-800, doi:10.1016/j.cellsig.2010.01.003.
97. Stahl, A.; Joyal, J.S.; Chen, J.; Sapielha, P.; Juan, A.M.; Hatton, C.J.; Pei, D.T.; Hurst, C.G.; Seaward, M.R.; Krah, N.M., et al. SOCS3 is an endogenous inhibitor of pathologic angiogenesis. *Blood* **2012**, *120*, 2925-2929, doi:10.1182/blood-2012-04-422527.
98. Grossmann, A.; Benlasfer, N.; Birth, P.; Hegele, A.; Wachsmuth, F.; Apelt, L.; Stelzl, U. Phospho-tyrosine dependent protein-protein interaction network. *Mol Syst Biol* **2015**, *11*, 794, doi:10.15252/msb.20145968.
99. Wu, Q.Y.; Zhu, Y.Y.; Liu, Y.; Wei, F.; Tong, Y.X.; Cao, J.; Zhou, P.; Niu, M.S.; Li, Z.Y.; Zeng, L.Y., et al. CUEDC2, a novel interacting partner of the SOCS1 protein, plays important roles in the leukaemogenesis of acute myeloid leukaemia. *Cell Death Dis* **2018**, *9*, 774, doi:10.1038/s41419-018-0812-6.
100. Chung, S.S.; Laddach, A.; Thomas, N.S.B.; Fraternali, F. Short loop motif profiling of protein interaction networks in acute myeloid leukaemia. *bioRxiv* **2018**, doi: <http://dx.doi.org/10.1101/306886>.
101. Taniguchi, C.M.; Winnay, J.; Kondo, T.; Bronson, R.T.; Guimaraes, A.R.; Aleman, J.O.; Luo, J.; Stephanopoulos, G.; Weissleder, R.; Cantley, L.C., et al. The phosphoinositide 3-kinase regulatory subunit p85alpha can exert tumor suppressor properties through negative regulation of growth factor signaling. *Cancer Res* **2010**, *70*, 5305-5315, doi:10.1158/0008-5472.CAN-09-3399.
102. Taniguchi, C.M.; Tran, T.T.; Kondo, T.; Luo, J.; Ueki, K.; Cantley, L.C.; Kahn, C.R. Phosphoinositide 3-kinase regulatory subunit p85alpha suppresses insulin action via positive regulation of PTEN. *Proc Natl Acad Sci U S A* **2006**, *103*, 12093-12097, doi:10.1073/pnas.0604628103.
103. Li, X.; Mak, V.C.Y.; Zhou, Y.; Wang, C.; Wong, E.S.Y.; Sharma, R.; Lu, Y.; Cheung, A.N.Y.; Mills, G.B.; Cheung, L.W.T. Deregulated Gab2 phosphorylation mediates aberrant AKT and STAT3 signaling upon PIK3R1 loss in ovarian cancer. *Nat Commun* **2019**, *10*, 716, doi:10.1038/s41467-019-08574-7.
104. Liu, J.; Lichtenberg, T.; Hoadley, K.A.; Poisson, L.M.; Lazar, A.J.; Cherniack, A.D.; Kovatich, A.J.; Benz, C.C.; Levine, D.A.; Lee, A.V., et al. An Integrated TCGA Pan-Cancer Clinical Data Resource to Drive High-Quality Survival Outcome Analytics. *Cell* **2018**, *173*, 400-416 e411, doi:10.1016/j.cell.2018.02.052.
105. Chandrashekar, D.S.; Bashel, B.; Balasubramanya, S.A.H.; Creighton, C.J.; Ponce-Rodriguez, I.; Chakravarthi, B.; Varambally, S. UALCAN: A Portal for

Prognostic significance of *SOCS1* and *SOCS3* in HCC

Facilitating Tumor Subgroup Gene Expression and Survival Analyses. *Neoplasia* **2017**, *19*, 649-658, doi:10.1016/j.neo.2017.05.002.

Prognostic significance of *SOCS1* and *SOCS3* in HCC

**Table 1.** Genes that negatively correlate with *SOCS1* and/or *SOCS3* in the TCGA-LIHC dataset, and their impact on patient survival.

| <b>SOCS</b>                           | <b>Negatively correlated genes</b>                                            | <b>Oncogenic signaling Pathway</b>                                                                    | <b>Upregulation in tumor vs normal (<i>p</i> value)</b> | <b>Survival Probability <i>p</i> value</b>     |
|---------------------------------------|-------------------------------------------------------------------------------|-------------------------------------------------------------------------------------------------------|---------------------------------------------------------|------------------------------------------------|
| <b><i>SOCS1</i></b>                   | -                                                                             | -                                                                                                     | No difference                                           | 0.013                                          |
| <b><i>SOCS1</i></b>                   | <i>CDK2</i><br><i>PIK3R1</i> *                                                | Cell cycle regulation<br>PI3K-AKT-MTOR                                                                | 0.0001<br>No difference                                 | 0.011<br>(0.012)*                              |
| <b><i>SOCS3</i></b>                   | <i>E2F8</i><br><i>AKT1S1</i><br><i>MLST8</i><br><i>AURKA</i><br><i>MAP3K4</i> | Cell cycle regulation<br>PI3K-AKT-MTOR<br>PI3K-AKT-MTOR<br>Other Growth signaling<br>RAS-RAF-MEK-MAPK | 0.0001<br>0.0001<br>0.0001<br>0.0001<br>0.0001          | 0.006<br>0.00073<br>0.0014<br>0.0016<br>0.0025 |
| <b><i>SOCS1</i>,<br/><i>SOCS3</i></b> | <i>RPTOR</i><br><br><i>BRAF</i><br><i>MAPK1</i>                               | PI3K-AKT-MTOR<br><br>RAS-RAF-MEK-MAPK<br>RAS-RAF-MEK-MAPK                                             | 0.0001<br><br>0.0001<br>0.0001                          | 0.0043<br><br>0.0066<br>0.013                  |

\* High expression predicts better survival, for all others poor survival.

Prognostic significance of *SOCS1* and *SOCS3* in HCC

**Table 2.** Combinations of *SOCS1* or *SOCS3* and oncogenic signalling pathway genes that show significant prognosis in the Cox proportional hazard model.

| Selected Combinations                     | Oncogenic signaling Pathway     | Multivariate Cox model p-value | Univariate log-rank p-value | Survival probability | Number of subjects | HR [95% confidence intervals] |
|-------------------------------------------|---------------------------------|--------------------------------|-----------------------------|----------------------|--------------------|-------------------------------|
| Low <i>SOCS1</i><br>+ High <i>CDK1</i>    | Cell cycle                      | 0.0152                         | 0.0153                      | Poor                 | 17                 | 2.56<br>[1.28 - 5.11]         |
| Low <i>SOCS1</i><br>+ High <i>CXCL8</i> * | RTK signalling,<br>angiogenesis | <0.0001                        | <0.0001                     | Poor                 | 4                  | 7.97<br>[2.85 - 22.25]        |
| Low <i>SOCS1</i><br>+ High <i>IGF1R</i>   | RTK signalling,<br>angiogenesis | 0.0051                         | 0.007                       | Poor                 | 6                  | 5.98<br>[2.09 - 17.13]        |
| Low <i>SOCS1</i><br>+ High <i>CSF1</i>    | Proliferation                   | 0.0042                         | 0.0042                      | Poor                 | 11                 | 2.62<br>[1.19 - 5.78]         |
| Low <i>SOCS1</i><br>+ High <i>DAB2</i> ** | MAPK pathway                    | <0.0001                        | <0.0001                     | Poor                 | 8                  | 7.73<br>[3.45 - 17.35]        |
| Low <i>SOCS1</i><br>+ Low <i>PIK3R1</i>   | PI3K-AKT<br>pathway             | 0.0102                         | 0.0102                      | Poor                 | 9                  | 3.52<br>[1.55 - 8.01]         |
| Low <i>SOCS1</i><br>+ High <i>TSC1</i>    | PI3K-AKT<br>pathway             | 0.0248                         | 0.0274                      | Poor                 | 24                 | 2.84<br>[1.50 - 5.38]         |
| Low <i>SOCS1</i><br>+ High <i>RAF1</i>    | MAPK pathway                    | 0.0046                         | 0.0291                      | Better               | 28                 | 0.281<br>[0.11 - 0.71]        |
| Low <i>SOCS1</i><br>+ High <i>AKT1S1</i>  | PI3K-AKT<br>pathway             | 0.0034                         | 0.0187                      | Better               | 15                 | 0.08<br>[0.02 - 0.36]         |
| Low <i>SOCS1</i><br>+ Low <i>PIK3R2</i>   | PI3K-AKT<br>pathway             | 0.0192                         | 0.0344                      | Better               | 28                 | 0.224<br>[0.08 - 0.65]        |
| High <i>SOCS1</i><br>+ low <i>E2F5</i>    | Cell cycle                      | 0.0051                         | 0.0051                      | Better               | 22                 | 0.07<br>[0.01 - 0.05]         |
| High <i>SOCS1</i><br>+ High <i>PDGFA</i>  | RTK signalling,<br>angiogenesis | 0.0241                         | 0.0323                      | Better               | 26                 | 0.23<br>[0.09 - 0.61]         |
| High <i>SOCS1</i><br>+ High <i>KDR</i>    | RTK signalling,<br>angiogenesis | 0.0219                         | 0.0414                      | Better               | 19                 | 0.28<br>[0.09 - 0.89]         |
| High <i>SOCS1</i><br>+ High <i>E2F7</i>   | Cell cycle                      | 0.0012                         | 0.0334                      | Poor                 | 21                 | 4.98<br>[2.29 - 10.84]        |
| High <i>SOCS1</i><br>+ Low <i>OPCML</i>   | Proliferation                   | 0.0304                         | 0.0483                      | Poor                 | 23                 | 2.45<br>[1.34 - 4.49]         |
| Low <i>SOCS3</i><br>+ High <i>RBL1</i>    | Cell cycle                      | 0.0053                         | 0.0123                      | Poor                 | 23                 | 2.20<br>[1.20 - 4.03]         |
| Low <i>SOCS3</i><br>+ High <i>CXCL8</i> * | RTK signalling,<br>angiogenesis | 0.0017                         | 0.0017                      | Poor                 | 3                  | 7.03<br>[1.70 - 28.99]        |
| Low <i>SOCS3</i><br>+ High <i>FGFR1</i>   | Proliferation                   | 0.0125                         | 0.0173                      | Poor                 | 4                  | 4.15<br>[1.31 - 13.17]        |
| Low <i>SOCS3</i><br>+ Low <i>DLEC1</i>    | Proliferation                   | 0.0163                         | 0.0324                      | Poor                 | 22                 | 2.01<br>[1.12 - 3.58]         |

Prognostic significance of *SOCS1* and *SOCS3* in HCC

|                                           |                              |        |        |        |    |                       |
|-------------------------------------------|------------------------------|--------|--------|--------|----|-----------------------|
| Low <i>SOCS3</i><br>+ High <i>DAB2</i> ** | MAPK pathway                 | 0.0023 | 0.0023 | Poor   | 10 | 3.42<br>[1.49 - 7.84] |
| Low <i>SOCS3</i><br>+ High <i>PIK3R1</i>  | PI3K-AKT pathway             | 0.0232 | 0.0232 | Better | 27 | 0.21<br>[0.07 - 0.6]  |
| High <i>SOCS3</i><br>+ High <i>STAT5B</i> | Cell cycle                   | 0.008  | 0.0156 | Better | 15 | 0.11<br>[0.02 - 0.79] |
| High <i>SOCS3</i><br>+ Low <i>PDGFB</i>   | RTK signalling, angiogenesis | 0.0394 | 0.0317 | Better | 13 | 0.16<br>[0.02 - 1.17] |
| High <i>SOCS3</i><br>+ High <i>FOXO1</i>  | PI3K-AKT pathway             | 0.0214 | 0.0248 | Better | 34 | 0.42<br>[0.2 - 0.92]  |
| High <i>SOCS3</i><br>+ High <i>CDK1</i>   | Cell cycle                   | 0.0001 | 0.0001 | Poor   | 19 | 4.05<br>[2.15 - 7.63] |
| High <i>SOCS3</i><br>+ High <i>AURKA</i>  | Proliferation                | 0.0109 | 0.0109 | Poor   | 20 | 2.48<br>[1.29 - 4.77] |
| High <i>SOCS3</i><br>+ Low <i>MAP2K4</i>  | MAPK pathway                 | 0.0102 | 0.0143 | Poor   | 16 | 2.65<br>[1.41 - 4.96] |

**Limitations:** Comparison of the top or bottom 25% (high or low) with the rest (75) is arbitrary. Some combination groups have only a very few number of cases (Total n=362).

\*, \*\* synergy with both low *SOCS1* and low *SOCS3*.

## Figure Legends

**Figure 1.** Expression of *SOCS1* and *SOCS3* genes in TCGA-LIHC dataset and their prognostic significance. (A, B) Expression levels of *SOCS1* and *SOCS3* genes in the HCC tumors compared to normal liver tissue in the TCGA dataset. (B) Expression levels of *SOCS1* and *SOCS3* in different grades of HCC specimens. (C) Impact of high *SOCS1* and *SOCS3* expression on overall patient survival. The upper high expression quartile was compared with the remaining three-quarters of low/medium expression in the Kaplan-Meier plot.

**Figure 2.** Cell cycle regulation genes in the TCGA-LIHC dataset: correlation with *SOCS1* and *SOCS3* genes, expression in tumors and predictive value. (A) The mRNA expression levels of thirty-four genes of the cell cycle regulation implicated in oncogenesis were evaluated for correlation to *SOCS1* and *SOCS3* expression. The heatmap shows negative (mutual exclusivity) and positive (co-expression) correlations indicated by the color scale on the right. Asterisks within the heatmap indicate the statistical significance of the Spearman correlation. Blue circles on the left indicate Genes showing statistically significant negative correlation with *SOCS1* and yellow circles on the right mark genes showing mutual exclusivity with *SOCS3*. (B) Genes that show significant negative correlation with *SOCS1* and/or *SOCS3* were evaluated for their expression levels in HCC tumors compared to normal liver tissues. (C) Prognostic potential of the above genes was evaluated by comparing the upper quartile of high expression against the remaining three-quarters of low/medium expression by Kaplan-Meier plot. For genes showing statistically significant prognostic potential, with high gene expression correlating poor overall survival, the *p*-values are indicated in red color font.

**Figure 3.** Expression of RTK signaling and angiogenesis pathway genes in the TCGA-LIHC dataset: relationship to *SOCS1* and *SOCS3* expression and survival probability. (A) The mRNA expression levels of sixteen genes of the RTK signaling pathway and six genes of the angiogenesis pathway (two overlapping with the RTK pathway) implicated in oncogenesis were evaluated for correlation to *SOCS1* and *SOCS3* expression as in Figure 3A. MET is not listed in the TCGA oncogenic signaling genes but is included in analysis for reasons detailed in the text. (B) Expression levels of genes, which show significant negative correlation with *SOCS1* and/or *SOCS3*, in HCC tumors and normal liver tissues. (C) Prognostic potential of the above genes.

**Figure 4.** Other growth signaling and telomere maintenance genes: correlation with genes, expression in tumors and prognostic significance in the TCGA data on HCC. (A) Correlation between *SOCS1* and *SOCS3* gene expression with other growth signaling pathway genes implicated in oncogenesis. (B) Expression levels of genes, which show a significant negative correlation with *SOCS1* and/or *SOCS3*, in HCC tumors and normal liver tissues. (C) Predictive value of the above genes.

**Figure 5.** Correlation between *SOCS1*, *SOCS3* and the RAS-RAF-MEK-MAPK pathway genes and their prognostic significance in the TCGA-LIHC dataset. (A) The oncogenic RAS-RAF-MEK-MAPK pathway genes were compared with *SOCS1* and *SOCS3* to assess mutual exclusivity and co-expression. Certain common names of genes in this pathway are indicated below. (B) Expression levels of genes, which show significant negative correlation with *SOCS1* and/or *SOCS3*, in HCC tumors and normal liver tissues. (C) Prognostic potential of the above genes.

**Figure 6.** PI3K-AKT-MTOR pathway genes in the TCGA-LIHC dataset: relationship to *SOCS1* and *SOCS3* genes and predictive value. (A) Correlation between *SOCS1* and *SOCS3* gene expression with the PI3K-AKT-MTOR signaling pathway genes implicated in oncogenesis. (B) Expression levels of genes, which show a significant negative correlation with *SOCS1* and/or *SOCS3*, in HCC tumors and normal liver tissues. (C) Predictive value of the above genes. Note that the high expression of *PIK3R1* predicts better prognosis.

**Figure 7.** Summary of the correlation between *SOCS1*, *SOCS3* and the oncogenic signaling pathway genes. Numbers within the bars denote the number of genes with independent prognostic value.

**Figure 8.** Validation of the oncogenic signaling pathway genes that negatively correlate with *SOCS1* or *SOCS3* in murine and cell line models. (A) Partial hepatectomy was carried out on 8-10 weeks old mice lacking *Socs1* or *Socs3* in hepatocytes and control mice. The expression of the indicated genes in the regenerating livers was evaluated 24h later by qRT-PCR. n=4-6 mice per group. (B) Mice lacking *Socs1* or *Socs3* in hepatocytes and control mice were treated with DEN at 2 weeks of age and livers collected at 8-10 months of age. Tumor nodules and adjacent normal liver tissues were resected and expression of the indicated genes was evaluated by qRT-PCR. n=4-6 mice per group. (C) Murine HCC cell line Hepa1-6 was transfected with *SOCS1* or *SOCS3* expression constructs or the control vector, and expression of the indicated genes was evaluated 3h after IL-6 stimulation. Data shown are the mean + standard deviation from three independent experiments. *p*-values were calculated by 2-way ANOVA along with Tukey's Multiple Comparison test: \* *p* <0.05, \*\* *p* <0.01, \*\*\* *p* <0.001, \*\*\*\* *p* <0.0001. (D) Prognostic potential of segregating low *SOCS1* or *SOCS3* expression along with high *CDK2* or *AURKA* expression in the TCGA-LIHC dataset. Kaplan-Meier plot, the number of specimens within each group and the *p*-values calculated by the Gehan-Breslow-Wilcoxon test are shown.

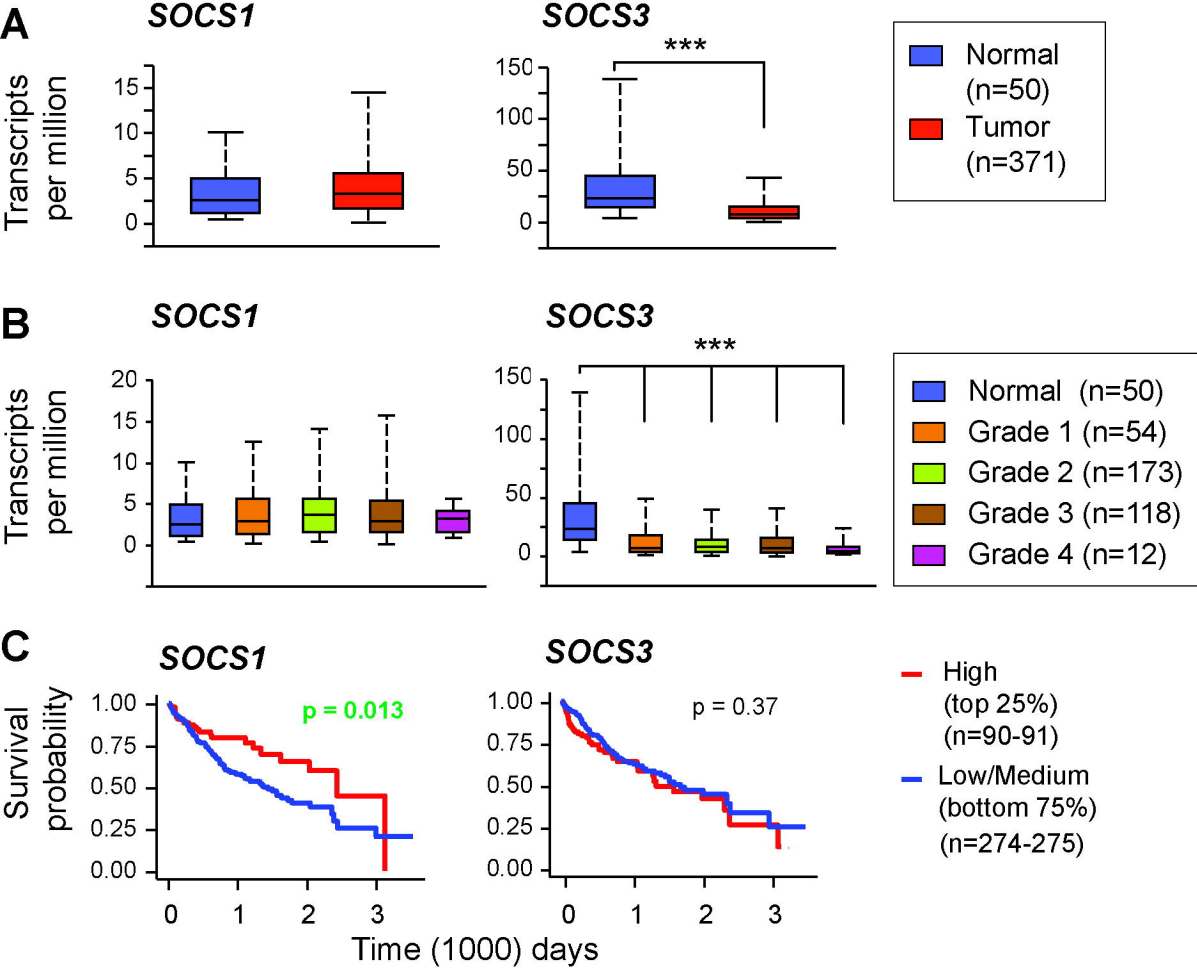



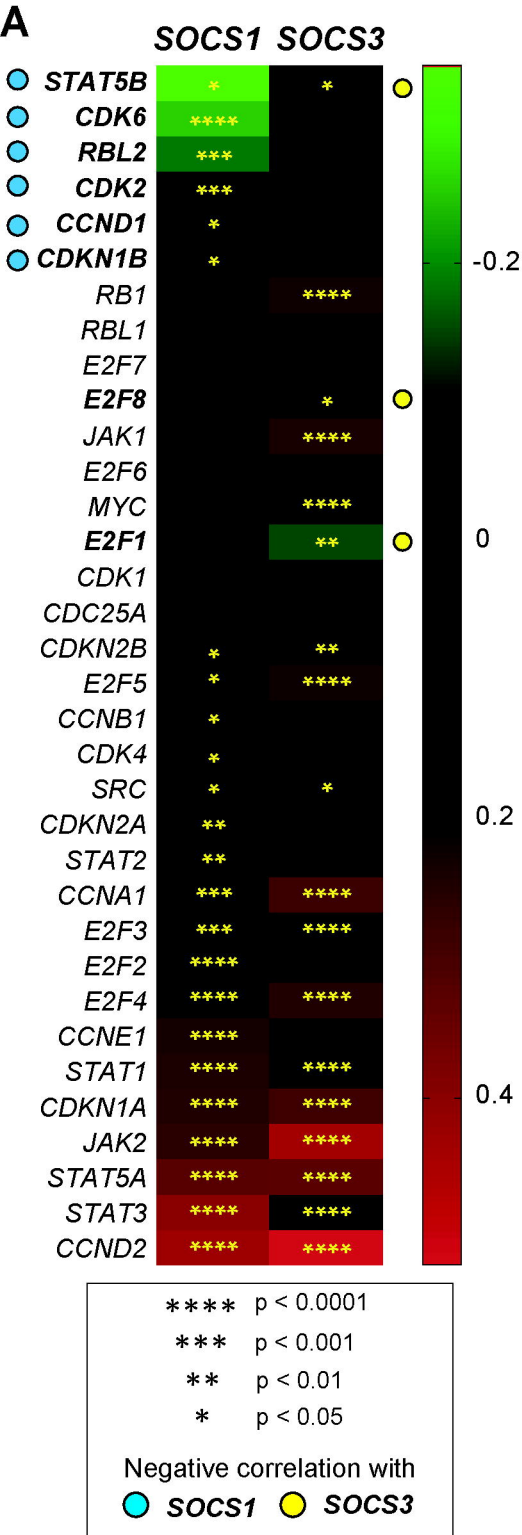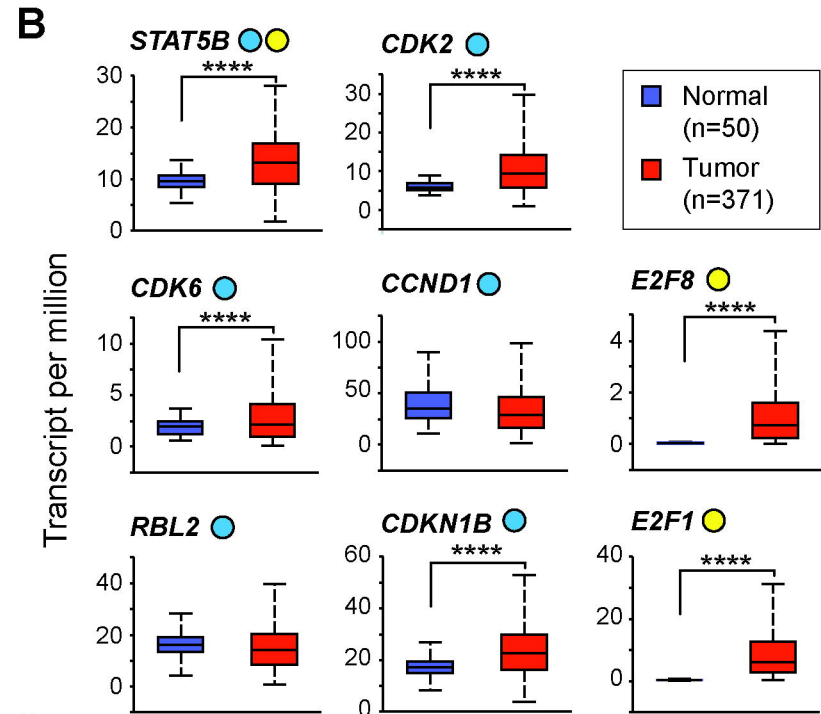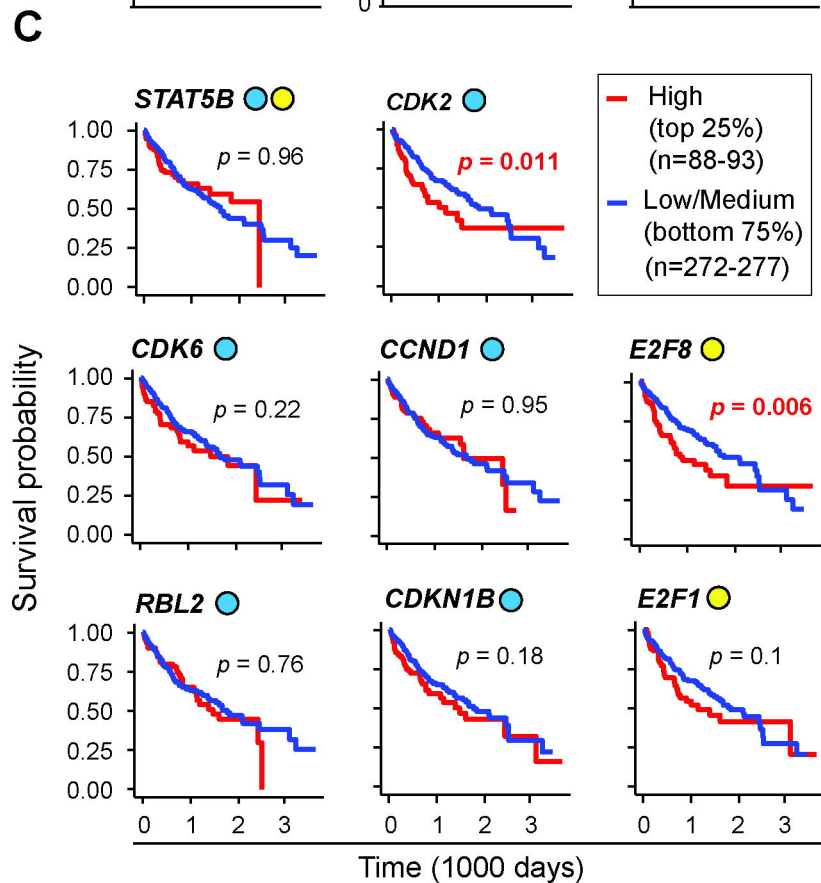

### A SOCS1 SOCS3

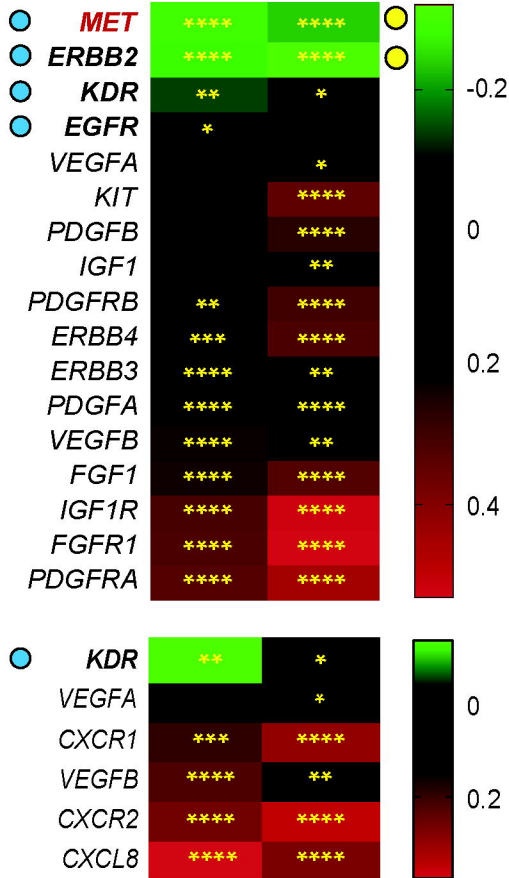

\*\*\*\* p < 0.0001  
 \*\*\* p < 0.001  
 \*\* p < 0.01  
 \* p < 0.05

### B

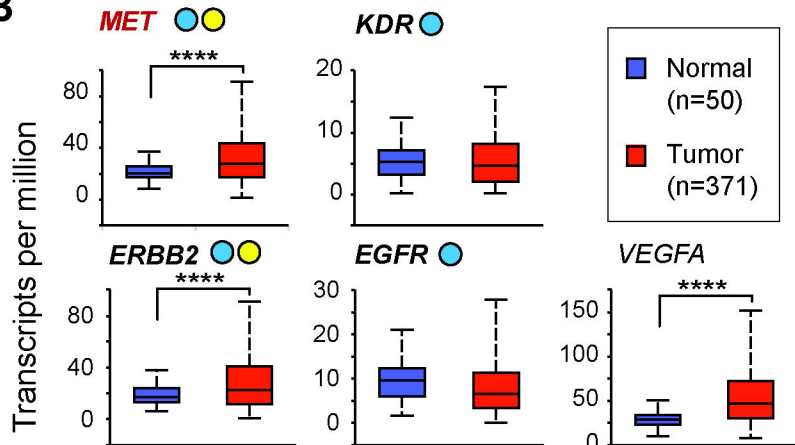

### C

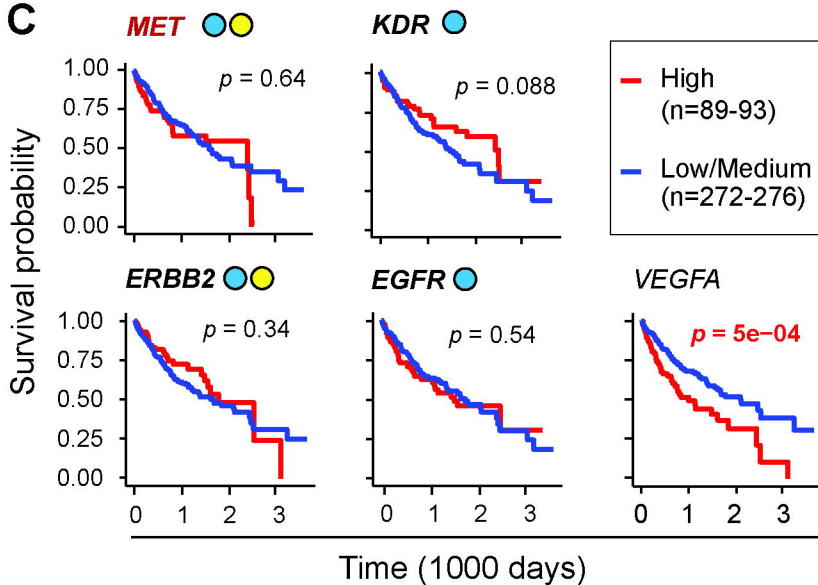

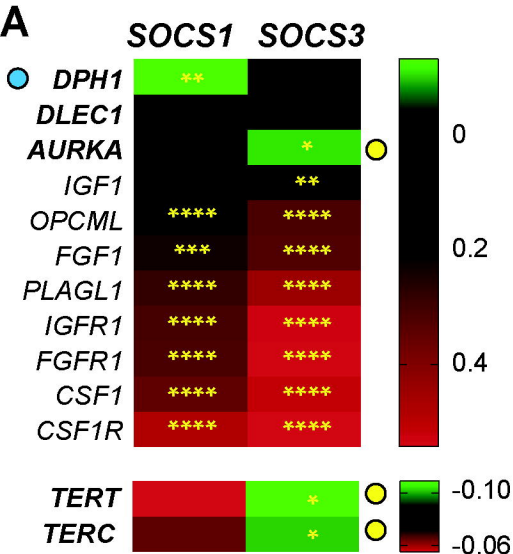

\*\*\*\*\*  $p < 0.0001$   
 \*\*\*  $p < 0.001$   
 \*\*  $p < 0.01$   
 \*  $p < 0.05$

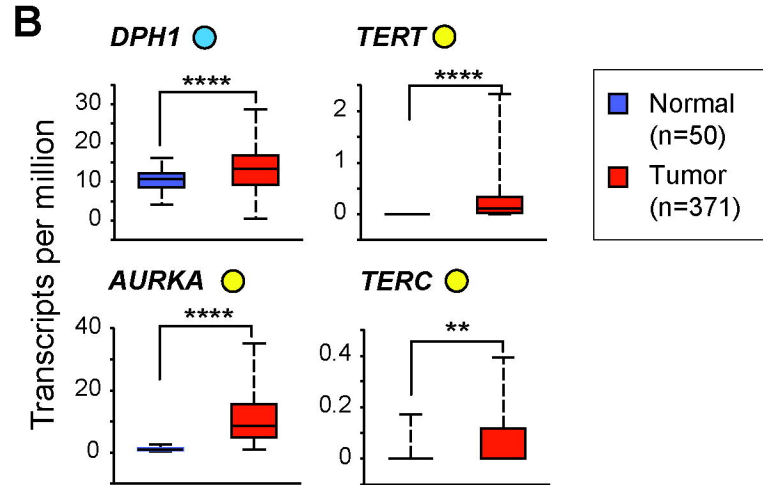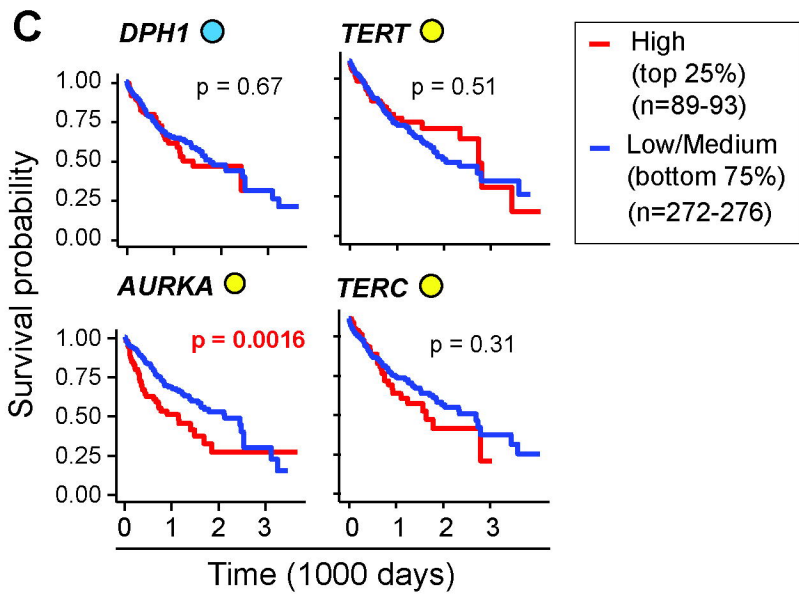

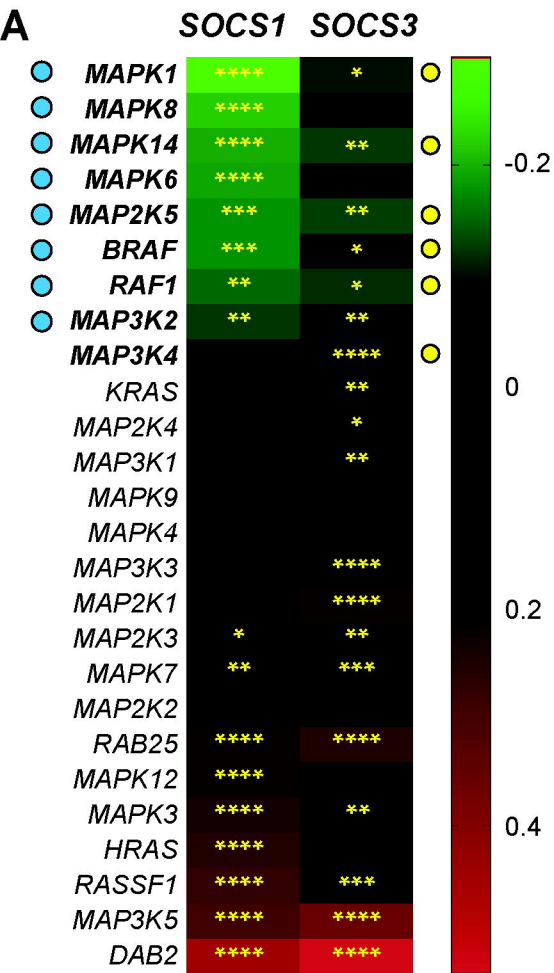

\*\*\*\* p < 0.0001  
 \*\*\* p < 0.001  
 \*\* p < 0.01  
 \* p < 0.05

MAPK1 = ERK2  
 MAPK3 = ERK1  
 MAPK4 = ERK4  
 MAPK6 = ERK3  
 MAPK7 = ERK5  
 MAPK8 = JNK1  
 MAPK9 = JNK2  
 MAPK14 = p38 MAPK

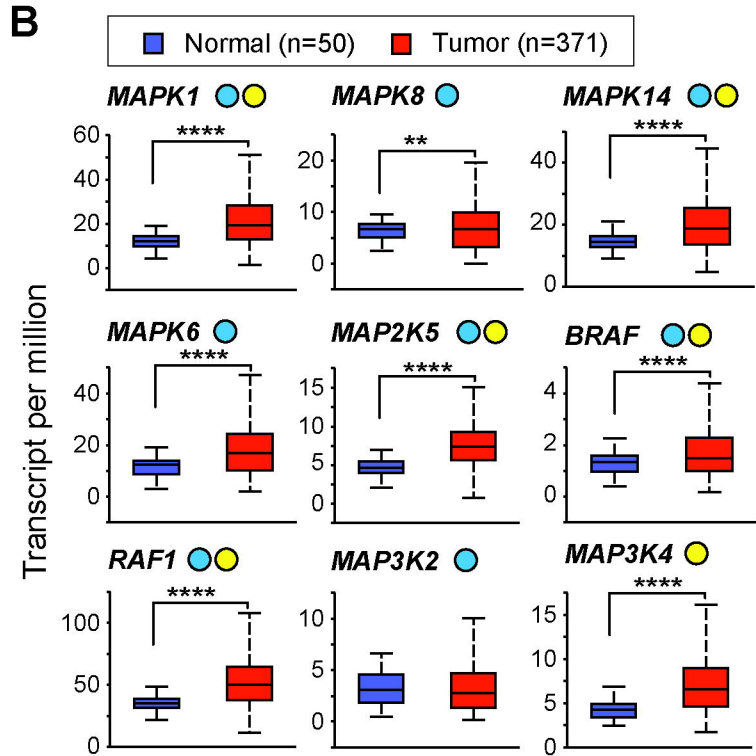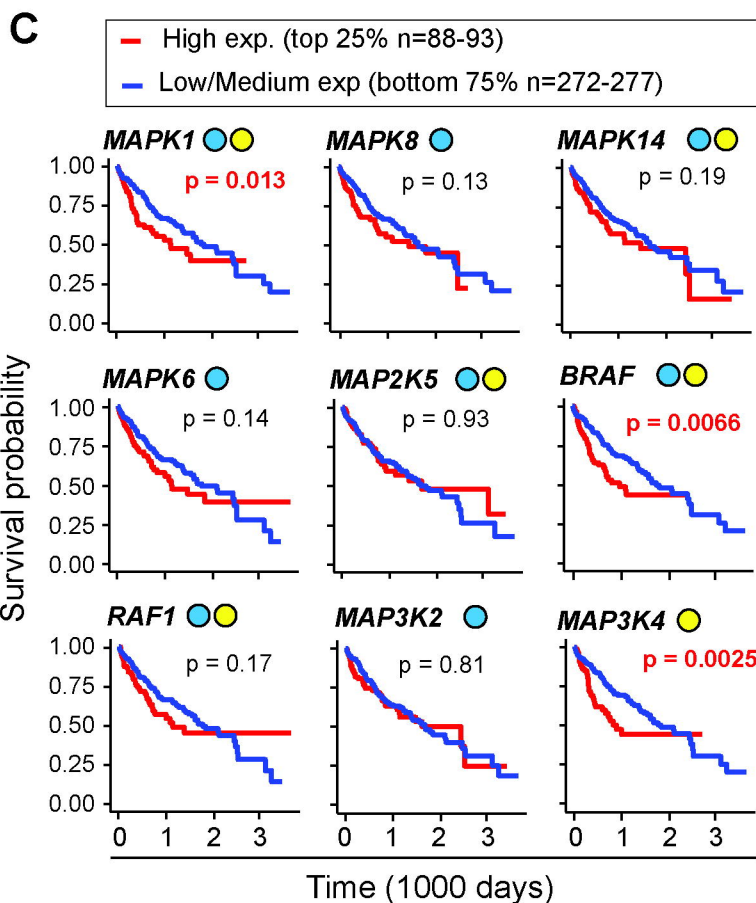

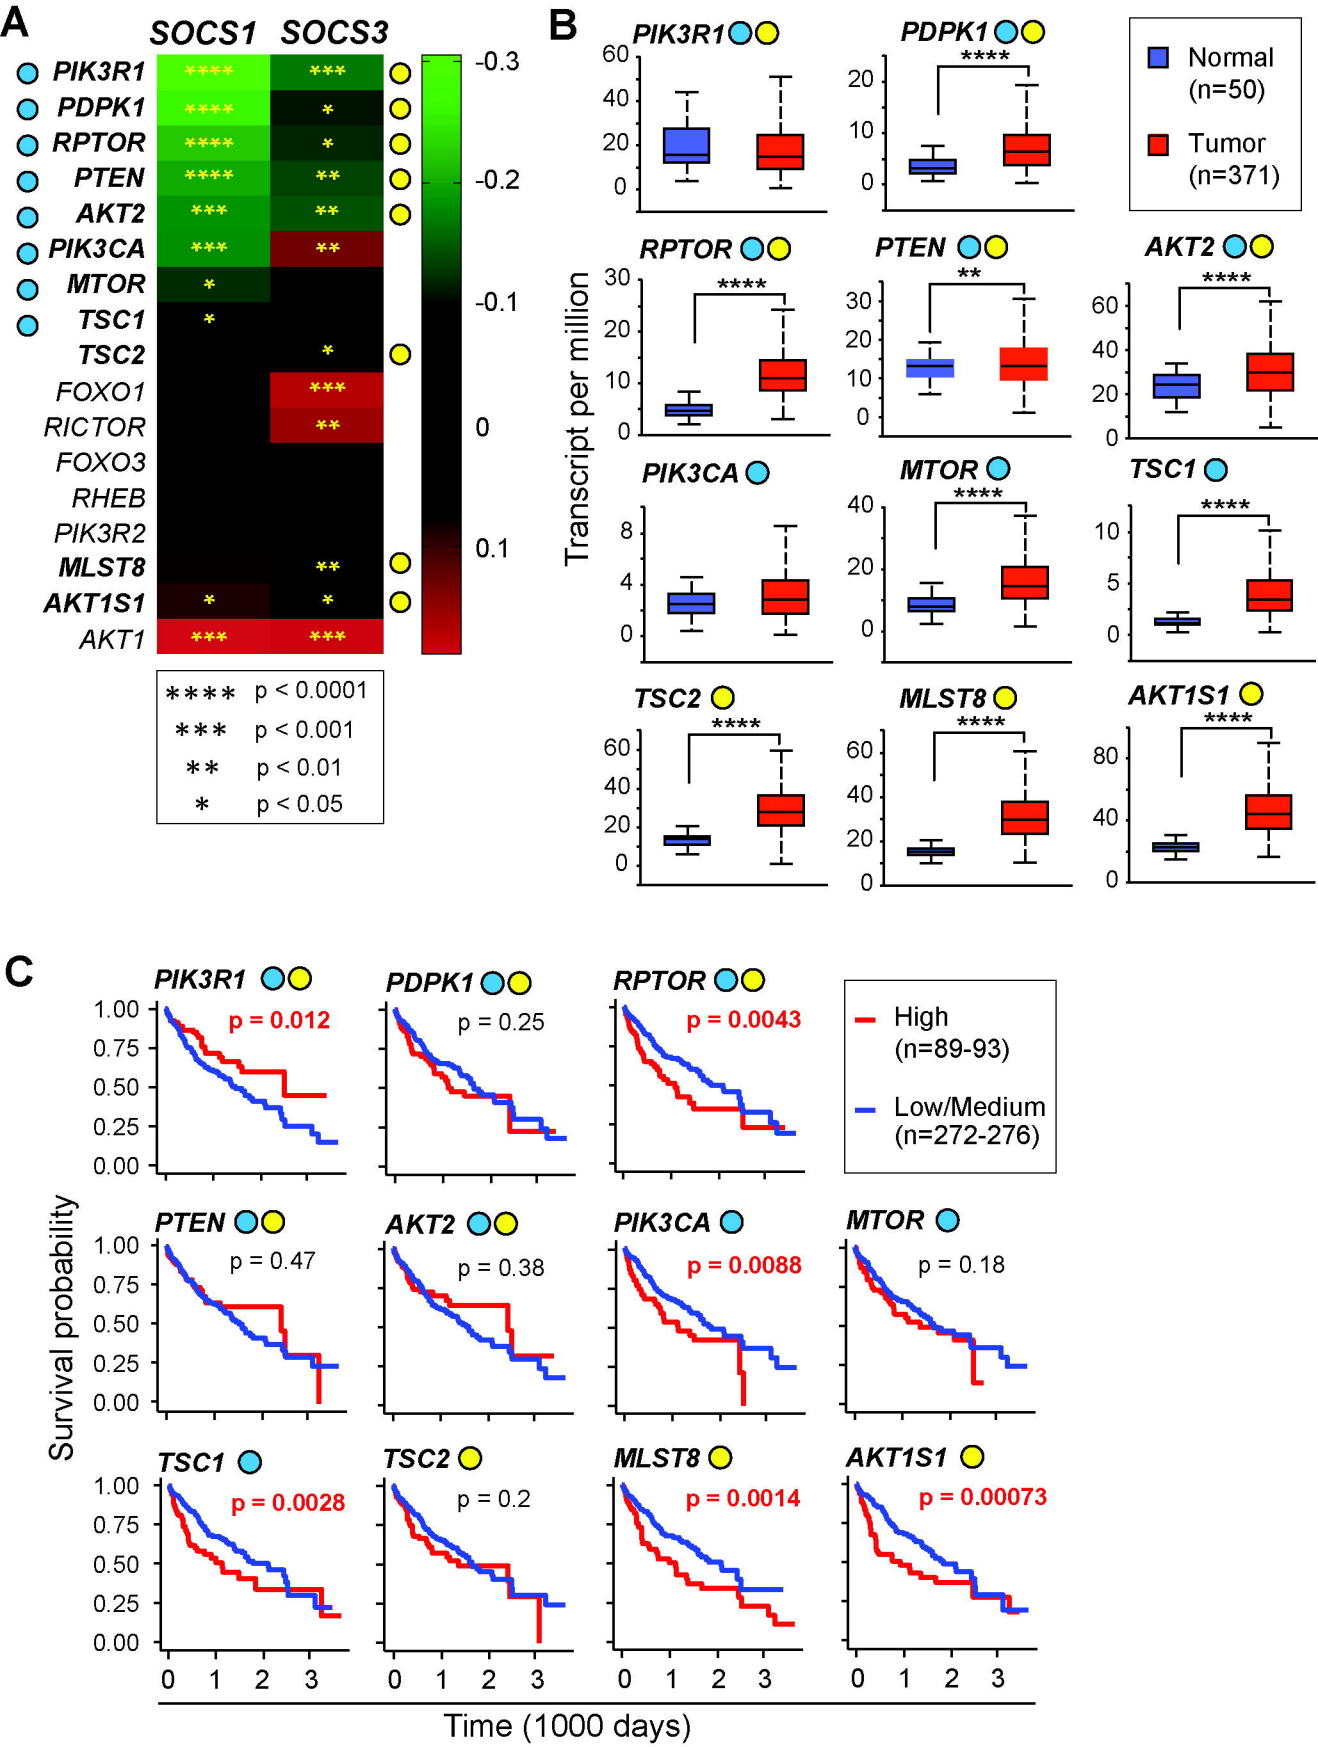

**Correlation:**

■ Negative

■ None

■ Positive

**Oncogenic Pathways**

(number of genes)

**SOCS1****SOCS3**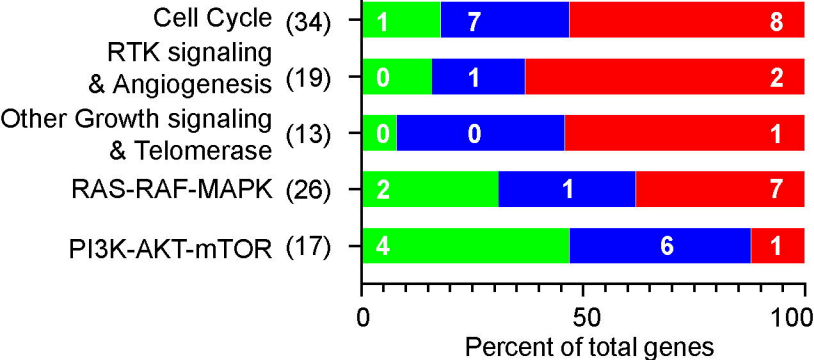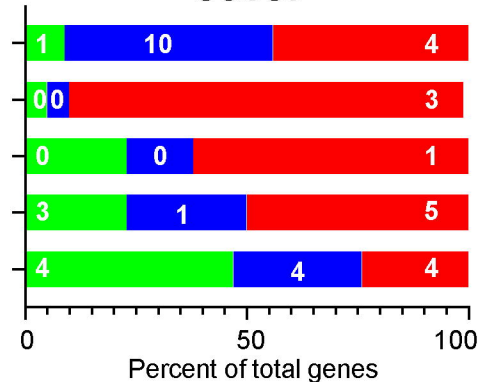

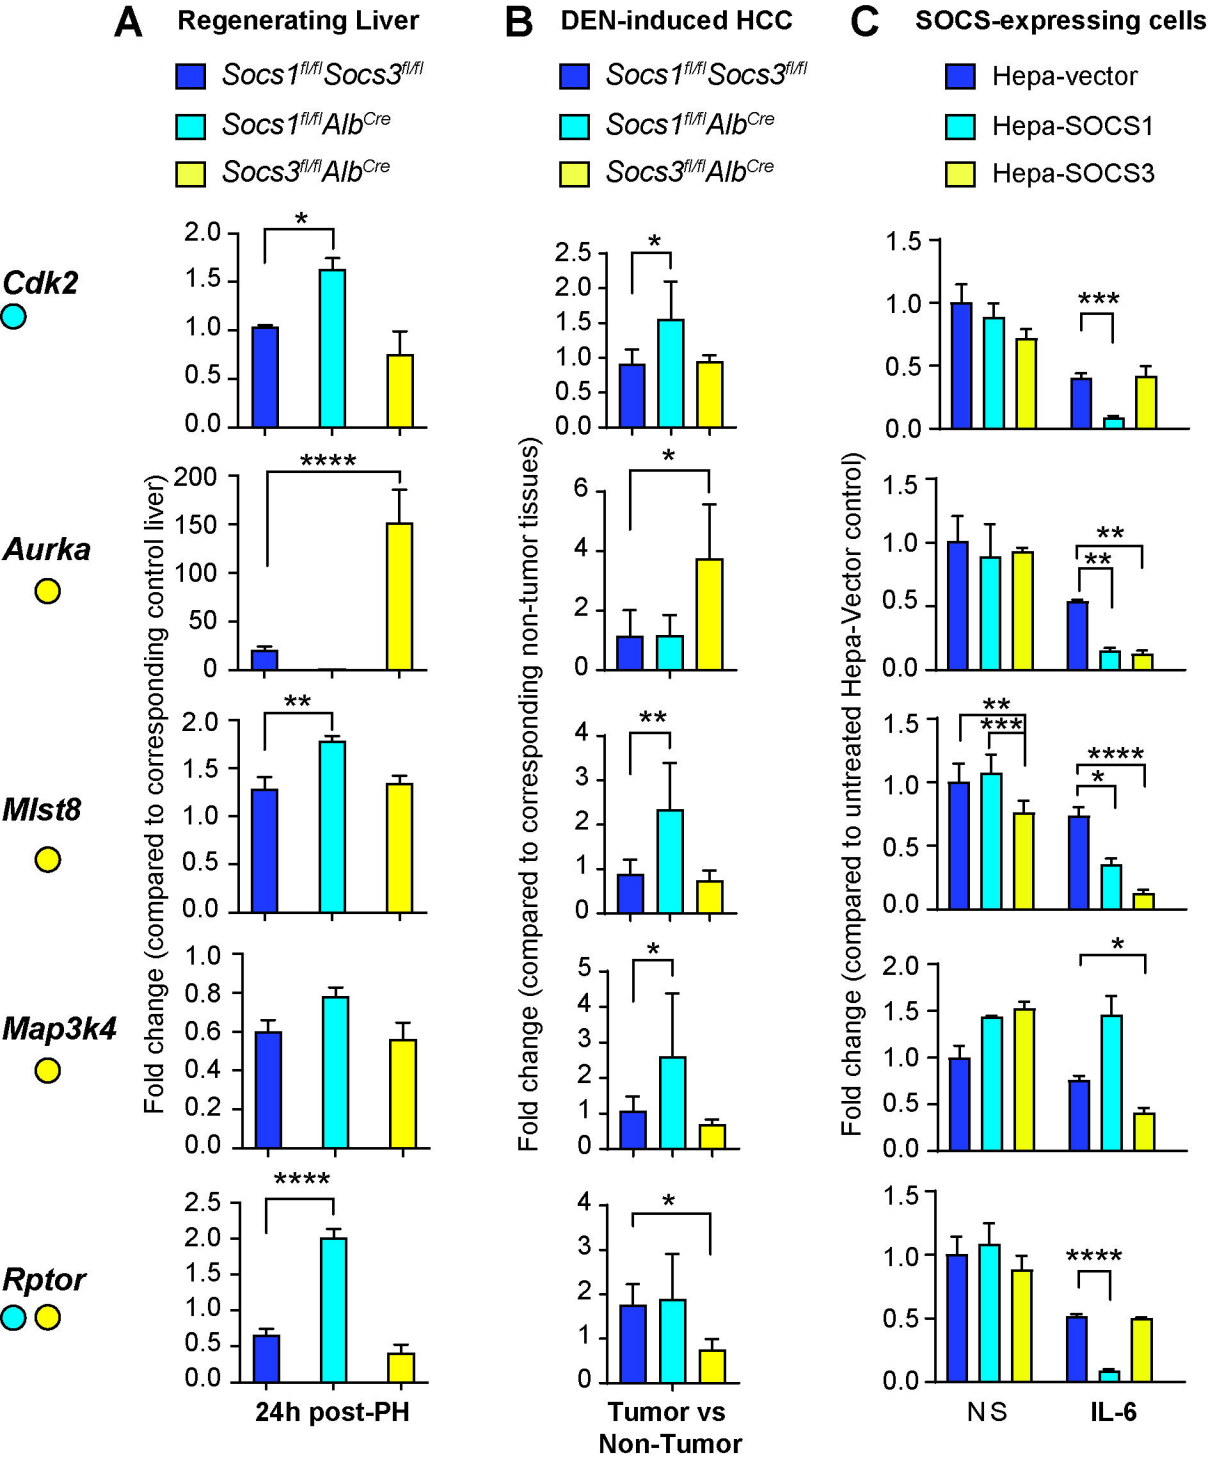

**D**

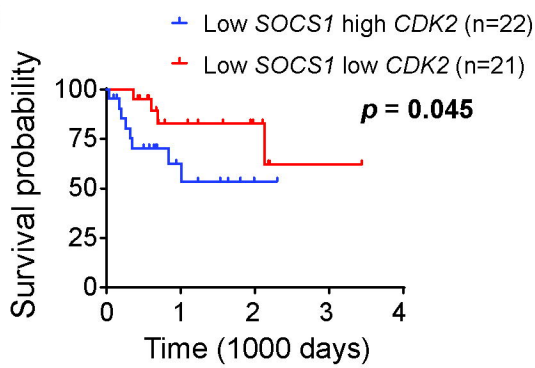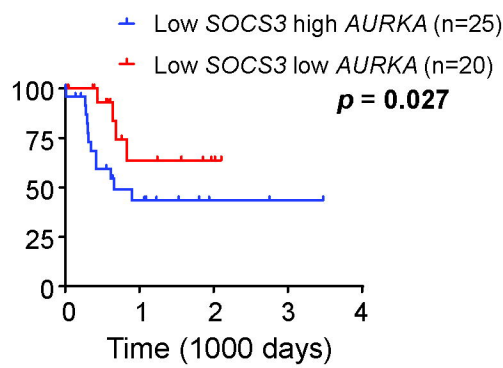

Source: https://www.biorxiv.org/content/10.1101/2020.02.21.958801v1.full.pdf
